# Supplementary material for: Leaf Morphology, Taxonomy and Geometric Morphometrics: A Simplified Protocol for Beginners
Source: PLoS One. 2011 Oct 3;6(10):e25630. doi: 10.1371/journal.pone.0025630 (PMC3184990; doi:10.1371/journal.pone.0025630)
Supplement: MorphoJ Raw Data S1 — Rawdata in .nts format. (NTS) [file pone.0025630.s005.nts]

1 176L 22L 0 
 Campo_T01_L1_R1 Campo_T01_L2_R1 Campo_T02_L1_R1 Campo_T02_L2_R1 Campo_T03_L1_R1 Campo_T03_L2_R1
 Campo_T04_L1_R1 Campo_T04_L2_R1 Campo_T05_L1_R1 Campo_T05_L2_R1 Campo_T06_L1_R1 Campo_T06_L2_R1
 Campo_T07_L1_R1 Campo_T07_L2_R1 Campo_T08_L1_R1 Campo_T08_L2_R1 Campo_T09_L1_R1 Campo_T09_L2_R1
 Campo_T10_L1_R1 Campo_T10_L2_R1 Campo_T11_L1_R1 Campo_T11_L2_R1 Campo_T12_L1_R1 Campo_T12_L2_R1
 Campo_T13_L1_R1 Campo_T13_L2_R1 Campo_T14_L1_R1 Campo_T14_L2_R1 Campo_T15_L1_R1 Campo_T15_L2_R1
 Campo_T16_L1_R1 Campo_T16_L2_R1 Campo_T17_L1_R1 Campo_T17_L2_R1 Campo_T18_L1_R1 Campo_T18_L2_R1
 Campo_T19_L1_R1 Campo_T19_L2_R1 Campo_T20_L1_R1 Campo_T20_L2_R1 Campo_T21_L1_R1 Campo_T21_L2_R1
 Campo_T22_L1_R1 Campo_T22_L2_R1 Campo_T01_L1_R2 Campo_T01_L2_R2 Campo_T02_L1_R2 Campo_T02_L2_R2
 Campo_T03_L1_R2 Campo_T03_L2_R2 Campo_T04_L1_R2 Campo_T04_L2_R2 Campo_T05_L1_R2 Campo_T05_L2_R2
 Campo_T06_L1_R2 Campo_T06_L2_R2 Campo_T07_L1_R2 Campo_T07_L2_R2 Campo_T08_L1_R2 Campo_T08_L2_R2
 Campo_T09_L1_R2 Campo_T09_L2_R2 Campo_T10_L1_R2 Campo_T10_L2_R2 Campo_T11_L1_R2 Campo_T11_L2_R2
 Campo_T12_L1_R2 Campo_T12_L2_R2 Campo_T13_L1_R2 Campo_T13_L2_R2 Campo_T14_L1_R2 Campo_T14_L2_R2
 Campo_T15_L1_R2 Campo_T15_L2_R2 Campo_T16_L1_R2 Campo_T16_L2_R2 Campo_T17_L1_R2 Campo_T17_L2_R2
 Campo_T18_L1_R2 Campo_T18_L2_R2 Campo_T19_L1_R2 Campo_T19_L2_R2 Campo_T20_L1_R2 Campo_T20_L2_R2
 Campo_T21_L1_R2 Campo_T21_L2_R2 Campo_T22_L1_R2 Campo_T22_L2_R2 Busso_T01_L1_R1 Busso_T01_L2_R1
 Busso_T02_L1_R1 Busso_T02_L2_R1 Busso_T03_L1_R1 Busso_T03_L2_R1 Busso_T04_L1_R1 Busso_T04_L2_R1
 Busso_T05_L1_R1 Busso_T05_L2_R1 Busso_T06_L1_R1 Busso_T06_L2_R1 Busso_T07_L1_R1 Busso_T07_L2_R1
 Busso_T08_L1_R1 Busso_T08_L2_R1 Busso_T09_L1_R1 Busso_T09_L2_R1 Busso_T10_L1_R1 Busso_T10_L2_R1
 Busso_T11_L1_R1 Busso_T11_L2_R1 Busso_T12_L1_R1 Busso_T12_L2_R1 Busso_T13_L1_R1 Busso_T13_L2_R1
 Busso_T14_L1_R1 Busso_T14_L2_R1 Busso_T15_L1_R1 Busso_T15_L2_R1 Busso_T16_L1_R1 Busso_T16_L2_R1
 Busso_T17_L1_R1 Busso_T17_L2_R1 Busso_T18_L1_R1 Busso_T18_L2_R1 Busso_T19_L1_R1 Busso_T19_L2_R1
 Busso_T20_L1_R1 Busso_T20_L2_R1 Busso_T21_L1_R1 Busso_T21_L2_R1 Busso_T22_L1_R1 Busso_T22_L2_R1
 Busso_T01_L1_R2 Busso_T01_L2_R2 Busso_T02_L1_R2 Busso_T02_L2_R2 Busso_T03_L1_R2 Busso_T03_L2_R2
 Busso_T04_L1_R2 Busso_T04_L2_R2 Busso_T05_L1_R2 Busso_T05_L2_R2 Busso_T06_L1_R2 Busso_T06_L2_R2
 Busso_T07_L1_R2 Busso_T07_L2_R2 Busso_T08_L1_R2 Busso_T08_L2_R2 Busso_T09_L1_R2 Busso_T09_L2_R2
 Busso_T10_L1_R2 Busso_T10_L2_R2 Busso_T11_L1_R2 Busso_T11_L2_R2 Busso_T12_L1_R2 Busso_T12_L2_R2
 Busso_T13_L1_R2 Busso_T13_L2_R2 Busso_T14_L1_R2 Busso_T14_L2_R2 Busso_T15_L1_R2 Busso_T15_L2_R2
 Busso_T16_L1_R2 Busso_T16_L2_R2 Busso_T17_L1_R2 Busso_T17_L2_R2 Busso_T18_L1_R2 Busso_T18_L2_R2
 Busso_T19_L1_R2 Busso_T19_L2_R2 Busso_T20_L1_R2 Busso_T20_L2_R2 Busso_T21_L1_R2 Busso_T21_L2_R2
 Busso_T22_L1_R2 Busso_T22_L2_R2
 x1 y1 x2 y2 x3 y3 x4 y4 x5 y5 x6 y6 x7 y7 x8 y8 x9 y9 x10 y10 x11 y11
 1.79648800000000E+0001 1.76259200000000E+0000 1.77530300000000E+0001 3.05064000000000E+0000
 1.78462440000000E+0001 1.20246060000000E+0001 1.80835160000000E+0001 1.17280160000000E+0001
 1.82614700000000E+0001 1.17195420000000E+0001 1.77276080000000E+0001 1.08467200000000E+0001
 1.76852380000000E+0001 4.09294200000000E+0000 1.93630900000000E+0001 4.67764800000000E+0000
 1.91088700000000E+0001 6.47413600000000E+0000 2.02952300000000E+0001 8.69432400000000E+0000
 1.77445560000000E+0001 6.07585800000000E+0000
 8.99938800000000E+0000 2.88963400000000E+0000 9.49935400000000E+0000 4.16920800000000E+0000
 9.80441800000000E+0000 1.42108980000000E+0001 1.00501640000000E+0001 1.39058340000000E+0001
 1.01688000000000E+0001 1.39058340000000E+0001 9.86373600000000E+0000 1.32363880000000E+0001
 9.55019800000000E+0000 4.67764800000000E+0000 1.06179220000000E+0001 5.15219200000000E+0000
 1.07619800000000E+0001 7.93166400000000E+0000 1.22618780000000E+0001 1.01179560000000E+0001
 9.59256800000000E+0000 7.92319000000000E+0000
 1.09399340000000E+0001 1.44905400000000E+0000 1.07789280000000E+0001 3.61839800000000E+0000
 1.12788940000000E+0001 1.54226800000000E+0001 1.16178540000000E+0001 1.50159280000000E+0001
 1.18042820000000E+0001 1.49820320000000E+0001 1.10755180000000E+0001 1.38549900000000E+0001
 1.07365580000000E+0001 4.44037600000000E+0000 1.23805140000000E+0001 5.13524400000000E+0000
 1.20839240000000E+0001 6.94020600000000E+0000 1.43719040000000E+0001 9.44003600000000E+0000
 1.07280840000000E+0001 6.77920000000000E+0000
 2.94047800000000E+0000 4.70307000000000E+0000 3.04216600000000E+0000 5.58436600000000E+0000
 3.52518400000000E+0000 1.33550240000000E+0001 3.76245600000000E+0000 1.31262260000000E+0001
 3.98278000000000E+0000 1.30669080000000E+0001 3.48281400000000E+0000 1.22449300000000E+0001
 3.03369200000000E+0000 6.21991600000000E+0000 4.06752000000000E+0000 6.62666800000000E+0000
 4.56748600000000E+0000 8.99938800000000E+0000 5.41488600000000E+0000 1.07111360000000E+0001
 3.20317200000000E+0000 8.60111000000000E+0000
 3.89804000000000E+0000 2.80489400000000E+0000 4.16073400000000E+0000 4.07599400000000E+0000
 3.75398200000000E+0000 1.24313580000000E+0001 4.14378600000000E+0000 1.22449300000000E+0001
 4.28784400000000E+0000 1.23042480000000E+0001 4.04209800000000E+0000 1.13551600000000E+0001
 4.22852600000000E+0000 4.60985600000000E+0000 5.69452800000000E+0000 5.34709400000000E+0000
 5.49962600000000E+0000 7.10121200000000E+0000 7.04189400000000E+0000 9.49088000000000E+0000
 4.37258400000000E+0000 6.93173200000000E+0000
 4.88949800000000E+0000 2.50830400000000E+0000 4.97423800000000E+0000 4.26242200000000E+0000
 4.60138200000000E+0000 1.49566100000000E+0001 4.94034200000000E+0000 1.46769680000000E+0001
 5.22845800000000E+0000 1.48125520000000E+0001 4.67764800000000E+0000 1.34651860000000E+0001
 4.95729000000000E+0000 4.78781000000000E+0000 6.21144200000000E+0000 5.19456200000000E+0000
 5.94027400000000E+0000 8.38078600000000E+0000 7.97403400000000E+0000 1.14060040000000E+0001
 4.72849200000000E+0000 8.21978000000000E+0000
 1.60073860000000E+0001 3.04216600000000E+0000 1.57531660000000E+0001 4.26242200000000E+0000
 1.56684260000000E+0001 1.33211280000000E+0001 1.60751780000000E+0001 1.29397980000000E+0001
 1.63124500000000E+0001 1.29482720000000E+0001 1.54481020000000E+0001 1.16263280000000E+0001
 1.56853740000000E+0001 4.84712800000000E+0000 1.65836180000000E+0001 5.37251600000000E+0000
 1.72022200000000E+0001 8.80448600000000E+0000 1.83546840000000E+0001 1.03552280000000E+0001
 1.54735240000000E+0001 8.27062400000000E+0000
 4.61833000000000E+0000 2.40661600000000E+0000 4.52511600000000E+0000 3.58450200000000E+0000
 4.68612200000000E+0000 1.35414520000000E+0001 4.94881600000000E+0000 1.32618100000000E+0001
 5.16914000000000E+0000 1.32363880000000E+0001 4.72849200000000E+0000 1.25754160000000E+0001
 4.47427200000000E+0000 4.28784400000000E+0000 5.51657400000000E+0000 4.75391400000000E+0000
 6.42329200000000E+0000 9.82136600000000E+0000 7.22832200000000E+0000 1.12619460000000E+0001
 4.47427200000000E+0000 8.87227800000000E+0000
 7.40627600000000E+0000 6.52498000000000E-0001 7.37238000000000E+0000 2.14392200000000E+0000
 7.17747800000000E+0000 1.38719380000000E+0001 7.55880800000000E+0000 1.29652200000000E+0001
 7.88929400000000E+0000 1.30160640000000E+0001 6.98257600000000E+0000 1.13297380000000E+0001
 7.38932800000000E+0000 2.62694000000000E+0000 8.80448600000000E+0000 3.02521800000000E+0000
 9.02481000000000E+0000 7.25374400000000E+0000 1.04569160000000E+0001 9.25360800000000E+0000
 7.27916600000000E+0000 6.44024000000000E+0000
 2.49983000000000E+0000 3.04216600000000E+0000 2.66083600000000E+0000 4.06752000000000E+0000
 3.55908000000000E+0000 1.35160300000000E+0001 3.89804000000000E+0000 1.29652200000000E+0001
 4.23700000000000E+0000 1.29991160000000E+0001 3.52518400000000E+0000 1.18551260000000E+0001
 2.81336800000000E+0000 5.65215800000000E+0000 4.66070000000000E+0000 6.16059800000000E+0000
 4.40648000000000E+0000 7.86387200000000E+0000 6.13517600000000E+0000 9.68578200000000E+0000
 3.05911400000000E+0000 7.71981400000000E+0000
 7.20290000000000E+0000 2.22866200000000E+0000 6.97410200000000E+0000 4.38953200000000E+0000
 6.33855200000000E+0000 1.75496540000000E+0001 7.10121200000000E+0000 1.65751440000000E+0001
 7.42322400000000E+0000 1.66344620000000E+0001 6.41481800000000E+0000 1.49905060000000E+0001
 6.94020600000000E+0000 5.42336000000000E+0000 8.32146800000000E+0000 6.35550000000000E+0000
 8.12656600000000E+0000 1.03891240000000E+0001 9.94847600000000E+0000 1.31092780000000E+0001
 6.66903800000000E+0000 9.86373600000000E+0000
 1.41431060000000E+0001 4.19463000000000E+0000 1.41600540000000E+0001 6.17754600000000E+0000
 1.39227820000000E+0001 2.02613340000000E+0001 1.47871300000000E+0001 1.89054940000000E+0001
 1.57531660000000E+0001 1.89648120000000E+0001 1.39058340000000E+0001 1.63209240000000E+0001
 1.40922620000000E+0001 7.54186000000000E+0000 1.58633280000000E+0001 8.48247400000000E+0000
 1.60751780000000E+0001 1.40075220000000E+0001 1.75157580000000E+0001 1.65412480000000E+0001
 1.39397300000000E+0001 1.27110000000000E+0001
 9.04175800000000E+0000 2.95742600000000E+0000 9.20276400000000E+0000 3.84719600000000E+0000
 9.12649800000000E+0000 1.34058680000000E+0001 9.50782800000000E+0000 1.29821680000000E+0001
 9.70273000000000E+0000 1.30075900000000E+0001 9.22818600000000E+0000 1.19229180000000E+0001
 9.22818600000000E+0000 4.33868800000000E+0000 1.01942220000000E+0001 4.81323200000000E+0000
 1.07619800000000E+0001 7.81302800000000E+0000 1.21008720000000E+0001 9.62646400000000E+0000
 9.16039400000000E+0000 7.16900400000000E+0000
 4.70307000000000E+0000 3.22859400000000E+0000 4.76238800000000E+0000 4.14378600000000E+0000
 3.28791200000000E+0000 1.26940520000000E+0001 3.77093000000000E+0000 1.21856120000000E+0001
 4.05904600000000E+0000 1.23466180000000E+0001 3.78787800000000E+0000 1.07704540000000E+0001
 4.72849200000000E+0000 4.59290800000000E+0000 5.50810000000000E+0000 5.17761400000000E+0000
 5.82163800000000E+0000 8.38078600000000E+0000 6.93173200000000E+0000 1.03382800000000E+0001
 4.42342800000000E+0000 7.53338600000000E+0000
 1.01857480000000E+0001 1.30499600000000E+0000 1.01094820000000E+0001 2.94895200000000E+0000
 9.69425600000000E+0000 1.14907440000000E+0001 1.00671120000000E+0001 1.11094140000000E+0001
 1.02874360000000E+0001 1.11772060000000E+0001 9.82136600000000E+0000 1.01433780000000E+0001
 1.01094820000000E+0001 3.99972800000000E+0000 1.23974620000000E+0001 4.47427200000000E+0000
 1.11517840000000E+0001 4.91492000000000E+0000 1.27872660000000E+0001 6.62666800000000E+0000
 1.00586380000000E+0001 5.02508200000000E+0000
 1.01688000000000E+0001 3.45739200000000E+0000 1.02959100000000E+0001 4.82170600000000E+0000
 1.05755520000000E+0001 1.26347340000000E+0001 1.08975640000000E+0001 1.22364560000000E+0001
 1.11178880000000E+0001 1.21940860000000E+0001 1.05331820000000E+0001 1.14399000000000E+0001
 1.04060720000000E+0001 5.61826200000000E+0000 1.18212300000000E+0001 5.90637800000000E+0000
 1.15076920000000E+0001 7.47406800000000E+0000 1.23974620000000E+0001 8.60111000000000E+0000
 1.04145460000000E+0001 7.24527000000000E+0000
 5.83858600000000E+0000 8.05030000000000E-0001 5.94027400000000E+0000 2.49983000000000E+0000
 5.98264400000000E+0000 1.42786900000000E+0001 6.42329200000000E+0000 1.32702840000000E+0001
 6.57582400000000E+0000 1.32787580000000E+0001 5.75384600000000E+0000 1.16263280000000E+0001
 5.84706000000000E+0000 3.60145000000000E+0000 7.66049600000000E+0000 4.37258400000000E+0000
 7.40627600000000E+0000 6.97410200000000E+0000 9.21123800000000E+0000 8.89770000000000E+0000
 5.67758000000000E+0000 6.59277200000000E+0000
 4.91492000000000E+0000 3.83872200000000E+0000 4.90644600000000E+0000 4.76238800000000E+0000
 4.89797200000000E+0000 1.40753140000000E+0001 5.16066600000000E+0000 1.36855100000000E+0001
 5.27930200000000E+0000 1.37109320000000E+0001 4.83865400000000E+0000 1.26347340000000E+0001
 4.78781000000000E+0000 5.58436600000000E+0000 6.03348800000000E+0000 6.49955800000000E+0000
 6.13517600000000E+0000 9.27903000000000E+0000 7.10121200000000E+0000 1.09145120000000E+0001
 4.62680400000000E+0000 8.45705200000000E+0000
 1.53125180000000E+0001 3.72008600000000E+0000 1.52870960000000E+0001 5.91485200000000E+0000
 1.47871300000000E+0001 1.55836860000000E+0001 1.52193040000000E+0001 1.50667720000000E+0001
 1.55582640000000E+0001 1.51599860000000E+0001 1.48888180000000E+0001 1.32279140000000E+0001
 1.52108300000000E+0001 6.77920000000000E+0000 1.66598840000000E+0001 7.52491200000000E+0000
 1.66514100000000E+0001 9.44003600000000E+0000 1.85580600000000E+0001 1.15500620000000E+0001
 1.50244020000000E+0001 8.85533000000000E+0000
 6.10975400000000E+0000 3.49128800000000E+0000 6.41481800000000E+0000 6.21991600000000E+0000
 5.54199600000000E+0000 1.99477960000000E+0001 6.21144200000000E+0000 1.94054600000000E+0001
 6.67751200000000E+0000 1.94986740000000E+0001 5.55894400000000E+0000 1.70581620000000E+0001
 6.23686400000000E+0000 7.17747800000000E+0000 8.28757200000000E+0000 8.70279800000000E+0000
 7.66897000000000E+0000 1.17873340000000E+0001 1.00840600000000E+0001 1.50328760000000E+0001
 5.62673600000000E+0000 1.09992520000000E+0001
 1.57785880000000E+0001 2.30492800000000E+0000 1.54904720000000E+0001 3.70313800000000E+0000
 1.53379400000000E+0001 1.37278800000000E+0001 1.56430040000000E+0001 1.32533360000000E+0001
 1.58972240000000E+0001 1.31940180000000E+0001 1.50667720000000E+0001 1.21093460000000E+0001
 1.53464140000000E+0001 4.82170600000000E+0000 1.65581960000000E+0001 5.28777600000000E+0000
 1.61768660000000E+0001 7.65202200000000E+0000 1.79733540000000E+0001 9.76204800000000E+0000
 1.51176160000000E+0001 7.33848400000000E+0000
 4.59290800000000E+0000 2.37272000000000E+0000 4.35563600000000E+0000 4.26242200000000E+0000
 4.25394800000000E+0000 1.44651180000000E+0001 4.53359000000000E+0000 1.40075220000000E+0001
 4.67764800000000E+0000 1.39651520000000E+0001 4.18615600000000E+0000 1.30753820000000E+0001
 4.34716200000000E+0000 5.38946400000000E+0000 6.33007800000000E+0000 5.93180000000000E+0000
 5.21151000000000E+0000 7.26221800000000E+0000 7.09273800000000E+0000 8.81296000000000E+0000
 4.41495400000000E+0000 7.17747800000000E+0000
 4.95729000000000E+0000 2.72862800000000E+0000 4.77086200000000E+0000 3.75398200000000E+0000
 4.62680400000000E+0000 1.24398320000000E+0001 4.80475800000000E+0000 1.21517160000000E+0001
 4.88949800000000E+0000 1.21517160000000E+0001 4.56748600000000E+0000 1.17788600000000E+0001
 4.66917400000000E+0000 4.38953200000000E+0000 5.71995000000000E+0000 4.98271200000000E+0000
 5.83858600000000E+0000 7.29611400000000E+0000 7.55880800000000E+0000 9.02481000000000E+0000
 4.39800600000000E+0000 6.97410200000000E+0000
 1.05247080000000E+0001 4.59290800000000E+0000 1.05586040000000E+0001 5.44030800000000E+0000
 1.01349040000000E+0001 1.40922620000000E+0001 1.05416560000000E+0001 1.36939840000000E+0001
 1.07958760000000E+0001 1.37194060000000E+0001 1.03213320000000E+0001 1.27533700000000E+0001
 1.05755520000000E+0001 6.10128000000000E+0000 1.19313920000000E+0001 6.78767400000000E+0000
 1.18974960000000E+0001 8.21130600000000E+0000 1.33211280000000E+0001 9.48240600000000E+0000
 1.06094480000000E+0001 7.90624200000000E+0000
 1.04653900000000E+0001 1.02535400000000E+0000 1.05247080000000E+0001 2.48288200000000E+0000
 1.12958420000000E+0001 1.24652540000000E+0001 1.17280160000000E+0001 1.20754500000000E+0001
 1.19398660000000E+0001 1.20923980000000E+0001 1.10839920000000E+0001 1.10670440000000E+0001
 1.05331820000000E+0001 3.30486000000000E+0000 1.20669760000000E+0001 4.03362400000000E+0000
 1.23296700000000E+0001 7.16053000000000E+0000 1.38804120000000E+0001 9.29597800000000E+0000
 1.07365580000000E+0001 6.66056400000000E+0000
 1.08551940000000E+0001 2.55914800000000E+0000 1.08382460000000E+0001 3.66924200000000E+0000
 1.06687660000000E+0001 1.22279820000000E+0001 1.09399340000000E+0001 1.20076580000000E+0001
 1.10755180000000E+0001 1.19907100000000E+0001 1.07450320000000E+0001 1.14144780000000E+0001
 1.07874020000000E+0001 4.77933600000000E+0000 1.18466520000000E+0001 5.64368400000000E+0000
 1.16517500000000E+0001 7.09273800000000E+0000 1.26855780000000E+0001 8.96549200000000E+0000
 1.07196100000000E+0001 6.94020600000000E+0000
 1.11856800000000E+0001 2.66931000000000E+0000 1.11009400000000E+0001 4.46579800000000E+0000
 1.05247080000000E+0001 1.08212980000000E+0001 1.11348360000000E+0001 1.02535400000000E+0001
 1.15331140000000E+0001 1.04569160000000E+0001 1.08551940000000E+0001 8.85533000000000E+0000
 1.11602580000000E+0001 5.16066600000000E+0000 1.26601560000000E+0001 5.62673600000000E+0000
 1.20585020000000E+0001 5.87248200000000E+0000 1.31685960000000E+0001 7.72828800000000E+0000
 1.11348360000000E+0001 5.94027400000000E+0000
 4.74544000000000E+0000 4.10141600000000E+0000 4.66070000000000E+0000 5.70300200000000E+0000
 4.16920800000000E+0000 1.31092780000000E+0001 4.47427200000000E+0000 1.29397980000000E+0001
 4.72849200000000E+0000 1.29397980000000E+0001 4.28784400000000E+0000 1.21517160000000E+0001
 4.62680400000000E+0000 6.39787000000000E+0000 6.70293400000000E+0000 7.24527000000000E+0000
 5.65215800000000E+0000 7.51643800000000E+0000 7.47406800000000E+0000 9.50782800000000E+0000
 4.58443400000000E+0000 7.39780200000000E+0000
 1.14060040000000E+0001 1.99139000000000E+0000 1.14483740000000E+0001 3.08453600000000E+0000
 1.08890900000000E+0001 1.19144440000000E+0001 1.11687320000000E+0001 1.16432760000000E+0001
 1.13043160000000E+0001 1.17364900000000E+0001 1.10670440000000E+0001 1.09399340000000E+0001
 1.14144780000000E+0001 3.75398200000000E+0000 1.25923640000000E+0001 4.33021400000000E+0000
 1.24228840000000E+0001 6.83851800000000E+0000 1.41939500000000E+0001 8.29604600000000E+0000
 1.12704200000000E+0001 6.35550000000000E+0000
 3.39807400000000E+0000 2.61846600000000E+0000 3.33028200000000E+0000 3.81330000000000E+0000
 2.43203800000000E+0000 1.29736940000000E+0001 2.93200400000000E+0000 1.26347340000000E+0001
 3.22859400000000E+0000 1.28381100000000E+0001 2.77947200000000E+0000 1.13466860000000E+0001
 3.30486000000000E+0000 5.13524400000000E+0000 4.62680400000000E+0000 5.55894400000000E+0000
 4.11836400000000E+0000 7.14358200000000E+0000 5.70300200000000E+0000 9.30445200000000E+0000
 3.29638600000000E+0000 7.16900400000000E+0000
 1.08551940000000E+0001 2.94895200000000E+0000 1.08128240000000E+0001 4.22005200000000E+0000
 1.03213320000000E+0001 1.36516140000000E+0001 1.07619800000000E+0001 1.33719720000000E+0001
 1.10162000000000E+0001 1.34397640000000E+0001 1.06263960000000E+0001 1.17703860000000E+0001
 1.08212980000000E+0001 4.84712800000000E+0000 1.18720740000000E+0001 5.37251600000000E+0000
 1.20923980000000E+0001 7.15205600000000E+0000 1.42786900000000E+0001 9.36377000000000E+0000
 1.08043500000000E+0001 6.56735000000000E+0000
 2.66931000000000E+0000 2.69473200000000E+0000 2.60151800000000E+0000 3.88956600000000E+0000
 3.16927600000000E+0000 1.29313240000000E+0001 3.61839800000000E+0000 1.23550920000000E+0001
 4.06752000000000E+0000 1.23889880000000E+0001 2.92353000000000E+0000 1.01772740000000E+0001
 2.66083600000000E+0000 4.62680400000000E+0000 3.76245600000000E+0000 5.09287400000000E+0000
 3.95735800000000E+0000 6.49955800000000E+0000 6.17754600000000E+0000 8.82990800000000E+0000
 2.82184200000000E+0000 6.15212400000000E+0000
 5.61826200000000E+0000 1.01688000000000E+0000 5.50810000000000E+0000 2.71168000000000E+0000
 5.25388000000000E+0000 1.47108640000000E+0001 5.49115200000000E+0000 1.44058000000000E+0001
 5.65215800000000E+0000 1.44058000000000E+0001 5.17761400000000E+0000 1.38295680000000E+0001
 5.44878200000000E+0000 3.35570400000000E+0000 6.29618200000000E+0000 4.16073400000000E+0000
 5.75384600000000E+0000 5.77079400000000E+0000 8.10114400000000E+0000 9.60104200000000E+0000
 5.43183400000000E+0000 6.49108400000000E+0000
 1.19144440000000E+0001 3.28791200000000E+0000 1.15839580000000E+0001 5.27930200000000E+0000
 1.14399000000000E+0001 1.66090400000000E+0001 1.17619120000000E+0001 1.60497560000000E+0001
 1.20415540000000E+0001 1.59989120000000E+0001 1.12619460000000E+0001 1.46430720000000E+0001
 1.14907440000000E+0001 6.21991600000000E+0000 1.27703180000000E+0001 6.90631000000000E+0000
 1.20330800000000E+0001 8.26215000000000E+0000 1.44566440000000E+0001 1.14060040000000E+0001
 1.14822700000000E+0001 8.93159600000000E+0000
 5.05897800000000E+0000 3.04216600000000E+0000 4.88949800000000E+0000 4.76238800000000E+0000
 4.81323200000000E+0000 1.38465160000000E+0001 5.15219200000000E+0000 1.32957060000000E+0001
 5.33862000000000E+0000 1.33804460000000E+0001 4.85560200000000E+0000 1.23720400000000E+0001
 4.82170600000000E+0000 5.38099000000000E+0000 6.00806600000000E+0000 6.27923400000000E+0000
 6.10128000000000E+0000 8.77906400000000E+0000 7.16053000000000E+0000 1.00755860000000E+0001
 4.69459600000000E+0000 7.90624200000000E+0000
 6.27076000000000E+0000 2.03376000000000E+0000 5.99959200000000E+0000 3.88109200000000E+0000
 4.96576400000000E+0000 1.45244360000000E+0001 5.34709400000000E+0000 1.41346320000000E+0001
 5.53352200000000E+0000 1.42024240000000E+0001 4.93186800000000E+0000 1.32448620000000E+0001
 5.87248200000000E+0000 4.53359000000000E+0000 8.33841600000000E+0000 5.89790400000000E+0000
 7.50796400000000E+0000 7.66049600000000E+0000 8.94007000000000E+0000 9.87221000000000E+0000
 5.50810000000000E+0000 6.72835600000000E+0000
 1.28211620000000E+0001 2.26255800000000E+0000 1.26177860000000E+0001 3.86414400000000E+0000
 1.24228840000000E+0001 1.28889540000000E+0001 1.29313240000000E+0001 1.22788260000000E+0001
 1.31601220000000E+0001 1.23296700000000E+0001 1.25245720000000E+0001 1.09992520000000E+0001
 1.26601560000000E+0001 5.15219200000000E+0000 1.49820320000000E+0001 5.78774200000000E+0000
 1.39227820000000E+0001 6.26228600000000E+0000 1.55497900000000E+0001 7.81302800000000E+0000
 1.27364220000000E+0001 6.21144200000000E+0000
 5.16066600000000E+0000 2.63541400000000E+0000 5.05050400000000E+0000 4.85560200000000E+0000
 4.77933600000000E+0000 1.61260220000000E+0001 5.06745200000000E+0000 1.58633280000000E+0001
 5.27930200000000E+0000 1.58294320000000E+0001 4.72001800000000E+0000 1.51515120000000E+0001
 5.03355600000000E+0000 6.38939600000000E+0000 7.44017200000000E+0000 7.39780200000000E+0000
 6.05891000000000E+0000 7.93166400000000E+0000 7.93166400000000E+0000 1.04314940000000E+0001
 4.96576400000000E+0000 8.18588400000000E+0000
 5.09287400000000E+0000 4.22852600000000E+0000 5.39793800000000E+0000 5.67758000000000E+0000
 4.97423800000000E+0000 1.35160300000000E+0001 5.31319800000000E+0000 1.31770700000000E+0001
 5.50810000000000E+0000 1.33211280000000E+0001 5.02508200000000E+0000 1.21093460000000E+0001
 5.44030800000000E+0000 6.40634400000000E+0000 7.49949000000000E+0000 7.18595200000000E+0000
 6.17754600000000E+0000 7.29611400000000E+0000 7.77913200000000E+0000 9.32987400000000E+0000
 5.44030800000000E+0000 7.32153600000000E+0000
 1.19144440000000E+0001 2.74557600000000E+0000 1.17873340000000E+0001 4.38953200000000E+0000
 1.26093120000000E+0001 1.44820660000000E+0001 1.28550580000000E+0001 1.38719380000000E+0001
 1.32109660000000E+0001 1.38380420000000E+0001 1.22110340000000E+0001 1.28720060000000E+0001
 1.17449640000000E+0001 5.05050400000000E+0000 1.39058340000000E+0001 6.24533800000000E+0000
 1.28211620000000E+0001 8.32994200000000E+0000 1.48295000000000E+0001 1.08467200000000E+0001
 1.15839580000000E+0001 8.13504000000000E+0000
 1.38041460000000E+0001 8.81296000000000E-0001 1.35414520000000E+0001 2.42356400000000E+0000
 1.38126200000000E+0001 1.50582980000000E+0001 1.39821000000000E+0001 1.46939160000000E+0001
 1.40668400000000E+0001 1.46939160000000E+0001 1.37787240000000E+0001 1.43973260000000E+0001
 1.35245040000000E+0001 3.00827000000000E+0000 1.52786220000000E+0001 3.77940400000000E+0000
 1.49057660000000E+0001 6.66903800000000E+0000 1.74055960000000E+0001 8.73669400000000E+0000
 1.36092440000000E+0001 6.59277200000000E+0000
 3.71161200000000E+0000 2.81336800000000E+0000 3.62687200000000E+0000 4.50816800000000E+0000
 4.03362400000000E+0000 1.46176500000000E+0001 4.17768200000000E+0000 1.42871640000000E+0001
 4.34716200000000E+0000 1.42871640000000E+0001 3.96583200000000E+0000 1.38041460000000E+0001
 3.54213200000000E+0000 5.26235400000000E+0000 4.59290800000000E+0000 5.77926800000000E+0000
 4.43190200000000E+0000 8.16046200000000E+0000 6.38092200000000E+0000 9.47393200000000E+0000
 3.41502200000000E+0000 8.30452000000000E+0000
 4.80475800000000E+0000 4.00820200000000E+0000 4.76238800000000E+0000 5.80469000000000E+0000
 3.68619000000000E+0000 1.45244360000000E+0001 4.09294200000000E+0000 1.41176840000000E+0001
 4.39800600000000E+0000 1.43125860000000E+0001 3.90651400000000E+0000 1.29143760000000E+0001
 4.65222600000000E+0000 6.85546600000000E+0000 6.94020600000000E+0000 8.59263600000000E+0000
 5.96569600000000E+0000 8.88075200000000E+0000 6.99105000000000E+0000 1.09568820000000E+0001
 4.50816800000000E+0000 8.38926000000000E+0000
 1.15246400000000E+0001 3.15232800000000E+0000 1.15500620000000E+0001 5.11829600000000E+0000
 1.18297040000000E+0001 1.44990140000000E+0001 1.21432420000000E+0001 1.41854760000000E+0001
 1.23720400000000E+0001 1.43295340000000E+0001 1.18297040000000E+0001 1.30753820000000E+0001
 1.15924320000000E+0001 6.17754600000000E+0000 1.42108980000000E+0001 7.24527000000000E+0000
 1.36346660000000E+0001 8.91464800000000E+0000 1.50328760000000E+0001 1.03975980000000E+0001
 1.17449640000000E+0001 8.16046200000000E+0000
 1.79903020000000E+0001 1.73717000000000E+0000 1.77699780000000E+0001 2.99979600000000E+0000
 1.78462440000000E+0001 1.20330800000000E+0001 1.80919900000000E+0001 1.17195420000000E+0001
 1.82868920000000E+0001 1.17280160000000E+0001 1.77360820000000E+0001 1.08636680000000E+0001
 1.76852380000000E+0001 4.08446800000000E+0000 1.93800380000000E+0001 4.66070000000000E+0000
 1.91258180000000E+0001 6.45718800000000E+0000 2.02867560000000E+0001 8.70279800000000E+0000
 1.77530300000000E+0001 6.07585800000000E+0000
 8.99938800000000E+0000 2.89810800000000E+0000 9.49088000000000E+0000 4.12683800000000E+0000
 9.81289200000000E+0000 1.42447940000000E+0001 1.00586380000000E+0001 1.39143080000000E+0001
 1.01772740000000E+0001 1.39058340000000E+0001 9.84678800000000E+0000 1.32279140000000E+0001
 9.55019800000000E+0000 4.65222600000000E+0000 1.06433440000000E+0001 5.10982200000000E+0000
 1.07450320000000E+0001 7.91471600000000E+0000 1.22703520000000E+0001 1.01264300000000E+0001
 9.59256800000000E+0000 7.94861200000000E+0000
 1.09314600000000E+0001 1.46600200000000E+0000 1.07789280000000E+0001 3.57602800000000E+0000
 1.12873680000000E+0001 1.54226800000000E+0001 1.16686980000000E+0001 1.49989800000000E+0001
 1.18212300000000E+0001 1.49905060000000E+0001 1.10839920000000E+0001 1.38634640000000E+0001
 1.07450320000000E+0001 4.44885000000000E+0000 1.23889880000000E+0001 5.13524400000000E+0000
 1.21008720000000E+0001 6.88936200000000E+0000 1.43719040000000E+0001 9.44851000000000E+0000
 1.07280840000000E+0001 6.76225200000000E+0000
 2.94895200000000E+0000 4.71154400000000E+0000 3.03369200000000E+0000 5.59284000000000E+0000
 3.55060600000000E+0000 1.33550240000000E+0001 3.77093000000000E+0000 1.31347000000000E+0001
 3.99125400000000E+0000 1.30753820000000E+0001 3.49128800000000E+0000 1.22618780000000E+0001
 3.04216600000000E+0000 6.20296800000000E+0000 4.08446800000000E+0000 6.60124600000000E+0000
 4.59290800000000E+0000 8.97396600000000E+0000 5.43183400000000E+0000 1.07111360000000E+0001
 3.21164600000000E+0000 8.60111000000000E+0000
 3.92346200000000E+0000 2.78794600000000E+0000 4.16920800000000E+0000 4.05057200000000E+0000
 3.75398200000000E+0000 1.24059360000000E+0001 4.16073400000000E+0000 1.22449300000000E+0001
 4.27937000000000E+0000 1.23127220000000E+0001 4.04209800000000E+0000 1.13382120000000E+0001
 4.22852600000000E+0000 4.61833000000000E+0000 5.69452800000000E+0000 5.33862000000000E+0000
 5.49962600000000E+0000 7.12663400000000E+0000 7.03342000000000E+0000 9.49088000000000E+0000
 4.36411000000000E+0000 6.92325800000000E+0000
 4.88102400000000E+0000 2.51677800000000E+0000 4.96576400000000E+0000 4.28784400000000E+0000
 4.58443400000000E+0000 1.49481360000000E+0001 4.94034200000000E+0000 1.46854420000000E+0001
 5.21151000000000E+0000 1.48040780000000E+0001 4.66917400000000E+0000 1.34567120000000E+0001
 4.94034200000000E+0000 4.74544000000000E+0000 6.21991600000000E+0000 5.21998400000000E+0000
 5.95722200000000E+0000 8.37231200000000E+0000 7.99098200000000E+0000 1.14060040000000E+0001
 4.74544000000000E+0000 8.23672800000000E+0000
 1.60243340000000E+0001 3.03369200000000E+0000 1.57870620000000E+0001 4.23700000000000E+0000
 1.56599520000000E+0001 1.33211280000000E+0001 1.60582300000000E+0001 1.29228500000000E+0001
 1.63209240000000E+0001 1.29567460000000E+0001 1.54565760000000E+0001 1.16602240000000E+0001
 1.56938480000000E+0001 4.85560200000000E+0000 1.65920920000000E+0001 5.36404200000000E+0000
 1.72276420000000E+0001 8.79601200000000E+0000 1.83716320000000E+0001 1.03467540000000E+0001
 1.54735240000000E+0001 8.24520200000000E+0000
 4.60985600000000E+0000 2.37272000000000E+0000 4.52511600000000E+0000 3.58450200000000E+0000
 4.67764800000000E+0000 1.35414520000000E+0001 4.96576400000000E+0000 1.32448620000000E+0001
 5.15219200000000E+0000 1.32533360000000E+0001 4.74544000000000E+0000 1.25754160000000E+0001
 4.47427200000000E+0000 4.27089600000000E+0000 5.51657400000000E+0000 4.73696600000000E+0000
 6.43176600000000E+0000 9.79594400000000E+0000 7.23679600000000E+0000 1.12788940000000E+0001
 4.48274600000000E+0000 8.88922600000000E+0000
 7.41475000000000E+0000 6.69446000000000E-0001 7.37238000000000E+0000 2.05918200000000E+0000
 7.18595200000000E+0000 1.38804120000000E+0001 7.55880800000000E+0000 1.29567460000000E+0001
 7.90624200000000E+0000 1.30075900000000E+0001 6.98257600000000E+0000 1.13466860000000E+0001
 7.39780200000000E+0000 2.60151800000000E+0000 8.77906400000000E+0000 3.05911400000000E+0000
 9.02481000000000E+0000 7.26221800000000E+0000 1.04738640000000E+0001 9.27055600000000E+0000
 7.27069200000000E+0000 6.44871400000000E+0000
 2.48288200000000E+0000 3.05911400000000E+0000 2.67778400000000E+0000 4.11836400000000E+0000
 3.55060600000000E+0000 1.35075560000000E+0001 3.91498800000000E+0000 1.29736940000000E+0001
 4.24547400000000E+0000 1.29736940000000E+0001 3.54213200000000E+0000 1.18551260000000E+0001
 2.82184200000000E+0000 5.64368400000000E+0000 4.65222600000000E+0000 6.16059800000000E+0000
 4.42342800000000E+0000 7.84692400000000E+0000 6.11822800000000E+0000 9.68578200000000E+0000
 3.06758800000000E+0000 7.73676200000000E+0000
 7.20290000000000E+0000 2.24561000000000E+0000 6.96562800000000E+0000 4.42342800000000E+0000
 6.33855200000000E+0000 1.75411800000000E+0001 7.10968600000000E+0000 1.65581960000000E+0001
 7.42322400000000E+0000 1.66090400000000E+0001 6.40634400000000E+0000 1.50413500000000E+0001
 6.94868000000000E+0000 5.44030800000000E+0000 8.32146800000000E+0000 6.35550000000000E+0000
 8.10961800000000E+0000 1.03806500000000E+0001 9.93152800000000E+0000 1.31177520000000E+0001
 6.67751200000000E+0000 9.85526200000000E+0000
 1.41600540000000E+0001 4.20310400000000E+0000 1.41515800000000E+0001 6.16059800000000E+0000
 1.39058340000000E+0001 2.02782820000000E+0001 1.48464480000000E+0001 1.88800720000000E+0001
 1.57701140000000E+0001 1.89563380000000E+0001 1.39227820000000E+0001 1.63039760000000E+0001
 1.40837880000000E+0001 7.49101600000000E+0000 1.58548540000000E+0001 8.49094800000000E+0000
 1.61006000000000E+0001 1.39905740000000E+0001 1.75157580000000E+0001 1.65497220000000E+0001
 1.39312560000000E+0001 1.27025260000000E+0001
 9.05023200000000E+0000 2.94895200000000E+0000 9.21123800000000E+0000 3.85567000000000E+0000
 9.11802400000000E+0000 1.34058680000000E+0001 9.50782800000000E+0000 1.29736940000000E+0001
 9.70273000000000E+0000 1.30160640000000E+0001 9.21971200000000E+0000 1.19398660000000E+0001
 9.22818600000000E+0000 4.33021400000000E+0000 1.01857480000000E+0001 4.83018000000000E+0000
 1.07704540000000E+0001 7.82150200000000E+0000 1.20500280000000E+0001 9.62646400000000E+0000
 9.15192000000000E+0000 7.15205600000000E+0000
 4.70307000000000E+0000 3.23706800000000E+0000 4.76238800000000E+0000 4.06752000000000E+0000
 3.27096400000000E+0000 1.27025260000000E+0001 3.78787800000000E+0000 1.21771380000000E+0001
 4.07599400000000E+0000 1.23381440000000E+0001 3.78787800000000E+0000 1.07535060000000E+0001
 4.73696600000000E+0000 4.60138200000000E+0000 5.47420400000000E+0000 5.17761400000000E+0000
 5.83858600000000E+0000 8.38078600000000E+0000 6.92325800000000E+0000 1.03043840000000E+0001
 4.44037600000000E+0000 7.50796400000000E+0000
 1.01857480000000E+0001 1.33041800000000E+0000 1.01179560000000E+0001 2.93200400000000E+0000
 9.67730800000000E+0000 1.14822700000000E+0001 1.00755860000000E+0001 1.11009400000000E+0001
 1.02789620000000E+0001 1.11941540000000E+0001 9.82984000000000E+0000 1.01603260000000E+0001
 1.01264300000000E+0001 3.98278000000000E+0000 1.23974620000000E+0001 4.44037600000000E+0000
 1.11433100000000E+0001 4.95729000000000E+0000 1.28211620000000E+0001 6.65209000000000E+0000
 1.00671120000000E+0001 5.03355600000000E+0000
 1.01772740000000E+0001 3.47434000000000E+0000 1.03128580000000E+0001 4.83865400000000E+0000
 1.05670780000000E+0001 1.26262600000000E+0001 1.09145120000000E+0001 1.22279820000000E+0001
 1.10924660000000E+0001 1.21856120000000E+0001 1.05331820000000E+0001 1.14483740000000E+0001
 1.03975980000000E+0001 5.58436600000000E+0000 1.18212300000000E+0001 5.91485200000000E+0000
 1.15076920000000E+0001 7.48254200000000E+0000 1.24313580000000E+0001 8.58416200000000E+0000
 1.04230200000000E+0001 7.24527000000000E+0000
 5.82163800000000E+0000 7.71134000000000E-0001 5.94027400000000E+0000 2.54220000000000E+0000
 5.99959200000000E+0000 1.42786900000000E+0001 6.45718800000000E+0000 1.32448620000000E+0001
 6.57582400000000E+0000 1.32787580000000E+0001 5.77079400000000E+0000 1.16093800000000E+0001
 5.86400800000000E+0000 3.57602800000000E+0000 7.68591800000000E+0000 4.38105800000000E+0000
 7.38932800000000E+0000 6.95715400000000E+0000 9.21971200000000E+0000 8.89770000000000E+0000
 5.66910600000000E+0000 6.55040200000000E+0000
 4.90644600000000E+0000 3.87261800000000E+0000 4.89797200000000E+0000 4.77933600000000E+0000
 4.92339400000000E+0000 1.40583660000000E+0001 5.17761400000000E+0000 1.36855100000000E+0001
 5.26235400000000E+0000 1.37194060000000E+0001 4.83018000000000E+0000 1.26177860000000E+0001
 4.80475800000000E+0000 5.56741800000000E+0000 6.03348800000000E+0000 6.51650600000000E+0000
 6.13517600000000E+0000 9.27055600000000E+0000 7.10968600000000E+0000 1.09060380000000E+0001
 4.62680400000000E+0000 8.45705200000000E+0000
 1.53379400000000E+0001 3.72856000000000E+0000 1.53040440000000E+0001 5.88095600000000E+0000
 1.47871300000000E+0001 1.55667380000000E+0001 1.52532000000000E+0001 1.50328760000000E+0001
 1.55752120000000E+0001 1.51345640000000E+0001 1.48888180000000E+0001 1.32109660000000E+0001
 1.52277780000000E+0001 6.77072600000000E+0000 1.66683580000000E+0001 7.52491200000000E+0000
 1.66598840000000E+0001 9.44003600000000E+0000 1.85495860000000E+0001 1.15500620000000E+0001
 1.50244020000000E+0001 8.87227800000000E+0000
 6.08433200000000E+0000 3.50823600000000E+0000 6.38939600000000E+0000 6.21144200000000E+0000
 5.56741800000000E+0000 1.99393220000000E+0001 6.21144200000000E+0000 1.94139340000000E+0001
 6.68598600000000E+0000 1.94986740000000E+0001 5.56741800000000E+0000 1.70412140000000E+0001
 6.24533800000000E+0000 7.18595200000000E+0000 8.30452000000000E+0000 8.69432400000000E+0000
 7.67744400000000E+0000 1.17703860000000E+0001 1.00755860000000E+0001 1.50244020000000E+0001
 5.62673600000000E+0000 1.09568820000000E+0001
 1.57701140000000E+0001 2.30492800000000E+0000 1.54989460000000E+0001 3.72008600000000E+0000
 1.53209920000000E+0001 1.37109320000000E+0001 1.56599520000000E+0001 1.32363880000000E+0001
 1.58972240000000E+0001 1.32109660000000E+0001 1.50582980000000E+0001 1.21008720000000E+0001
 1.53548880000000E+0001 4.83018000000000E+0000 1.65412480000000E+0001 5.29625000000000E+0000
 1.61599180000000E+0001 7.65202200000000E+0000 1.79733540000000E+0001 9.77052200000000E+0000
 1.51176160000000E+0001 7.33001000000000E+0000
 4.59290800000000E+0000 2.38966800000000E+0000 4.36411000000000E+0000 4.30479200000000E+0000
 4.25394800000000E+0000 1.44651180000000E+0001 4.56748600000000E+0000 1.40075220000000E+0001
 4.70307000000000E+0000 1.39736260000000E+0001 4.20310400000000E+0000 1.31177520000000E+0001
 4.35563600000000E+0000 5.44030800000000E+0000 6.32160400000000E+0000 5.92332600000000E+0000
 5.23693200000000E+0000 7.25374400000000E+0000 7.10121200000000E+0000 8.81296000000000E+0000
 4.41495400000000E+0000 7.15205600000000E+0000
 4.96576400000000E+0000 2.71168000000000E+0000 4.75391400000000E+0000 3.77093000000000E+0000
 4.63527800000000E+0000 1.24228840000000E+0001 4.82170600000000E+0000 1.21432420000000E+0001
 4.88102400000000E+0000 1.21432420000000E+0001 4.57596000000000E+0000 1.17873340000000E+0001
 4.67764800000000E+0000 4.37258400000000E+0000 5.72842400000000E+0000 4.96576400000000E+0000
 5.83858600000000E+0000 7.29611400000000E+0000 7.58423000000000E+0000 9.01633600000000E+0000
 4.40648000000000E+0000 6.98257600000000E+0000
 1.05331820000000E+0001 4.60138200000000E+0000 1.05670780000000E+0001 5.39793800000000E+0000
 1.01264300000000E+0001 1.40922620000000E+0001 1.05586040000000E+0001 1.37024580000000E+0001
 1.08043500000000E+0001 1.37024580000000E+0001 1.03213320000000E+0001 1.27448960000000E+0001
 1.06009740000000E+0001 6.13517600000000E+0000 1.19313920000000E+0001 6.79614800000000E+0000
 1.18805480000000E+0001 8.20283200000000E+0000 1.33126540000000E+0001 9.49088000000000E+0000
 1.06094480000000E+0001 7.94013800000000E+0000
 1.04569160000000E+0001 1.01688000000000E+0000 1.05162340000000E+0001 2.49135600000000E+0000
 1.13043160000000E+0001 1.24737280000000E+0001 1.17449640000000E+0001 1.20754500000000E+0001
 1.19229180000000E+0001 1.20923980000000E+0001 1.10924660000000E+0001 1.10670440000000E+0001
 1.05331820000000E+0001 3.27096400000000E+0000 1.20585020000000E+0001 4.01667600000000E+0000
 1.23296700000000E+0001 7.12663400000000E+0000 1.38804120000000E+0001 9.31292600000000E+0000
 1.07450320000000E+0001 6.64361600000000E+0000
 1.08636680000000E+0001 2.55914800000000E+0000 1.08551940000000E+0001 3.65229400000000E+0000
 1.06687660000000E+0001 1.22279820000000E+0001 1.09653560000000E+0001 1.19822360000000E+0001
 1.10755180000000E+0001 1.19907100000000E+0001 1.07619800000000E+0001 1.14144780000000E+0001
 1.07874020000000E+0001 4.77933600000000E+0000 1.18381780000000E+0001 5.64368400000000E+0000
 1.16517500000000E+0001 7.07579000000000E+0000 1.26940520000000E+0001 8.94007000000000E+0000
 1.07365580000000E+0001 6.95715400000000E+0000
 1.12026280000000E+0001 2.66931000000000E+0000 1.11094140000000E+0001 4.43190200000000E+0000
 1.05416560000000E+0001 1.08297720000000E+0001 1.11602580000000E+0001 1.02620140000000E+0001
 1.15246400000000E+0001 1.04653900000000E+0001 1.08721420000000E+0001 8.85533000000000E+0000
 1.11602580000000E+0001 5.14371800000000E+0000 1.26516820000000E+0001 5.65215800000000E+0000
 1.20415540000000E+0001 5.88943000000000E+0000 1.31855440000000E+0001 7.71134000000000E+0000
 1.11433100000000E+0001 5.95722200000000E+0000
 4.75391400000000E+0000 4.09294200000000E+0000 4.67764800000000E+0000 5.66063200000000E+0000
 4.16920800000000E+0000 1.31262260000000E+0001 4.48274600000000E+0000 1.29313240000000E+0001
 4.72849200000000E+0000 1.29397980000000E+0001 4.27937000000000E+0000 1.21517160000000E+0001
 4.65222600000000E+0000 6.38939600000000E+0000 6.69446000000000E+0000 7.26221800000000E+0000
 5.64368400000000E+0000 7.54186000000000E+0000 7.46559400000000E+0000 9.50782800000000E+0000
 4.58443400000000E+0000 7.43169800000000E+0000
 1.13805820000000E+0001 1.97444200000000E+0000 1.14483740000000E+0001 3.10995800000000E+0000
 1.08806160000000E+0001 1.19144440000000E+0001 1.11687320000000E+0001 1.16432760000000E+0001
 1.12958420000000E+0001 1.17280160000000E+0001 1.10839920000000E+0001 1.09484080000000E+0001
 1.14314260000000E+0001 3.73703400000000E+0000 1.26008380000000E+0001 4.33868800000000E+0000
 1.24228840000000E+0001 6.80462200000000E+0000 1.42024240000000E+0001 8.29604600000000E+0000
 1.12873680000000E+0001 6.35550000000000E+0000
 3.39807400000000E+0000 2.60151800000000E+0000 3.33875600000000E+0000 3.85567000000000E+0000
 2.43203800000000E+0000 1.29821680000000E+0001 2.92353000000000E+0000 1.26516820000000E+0001
 3.23706800000000E+0000 1.28296360000000E+0001 2.77947200000000E+0000 1.13466860000000E+0001
 3.31333400000000E+0000 5.13524400000000E+0000 4.61833000000000E+0000 5.55894400000000E+0000
 4.13531200000000E+0000 7.11816000000000E+0000 5.69452800000000E+0000 9.29597800000000E+0000
 3.31333400000000E+0000 7.13510800000000E+0000
 1.08636680000000E+0001 2.93200400000000E+0000 1.08212980000000E+0001 4.22005200000000E+0000
 1.03467540000000E+0001 1.36177180000000E+0001 1.08043500000000E+0001 1.33804460000000E+0001
 1.10162000000000E+0001 1.34312900000000E+0001 1.06433440000000E+0001 1.17534380000000E+0001
 1.08212980000000E+0001 4.83018000000000E+0000 1.18551260000000E+0001 5.39793800000000E+0000
 1.21178200000000E+0001 7.13510800000000E+0000 1.42702160000000E+0001 9.38071800000000E+0000
 1.08128240000000E+0001 6.53345400000000E+0000
 2.69473200000000E+0000 2.71168000000000E+0000 2.60151800000000E+0000 3.90651400000000E+0000
 3.16927600000000E+0000 1.29397980000000E+0001 3.60992400000000E+0000 1.23381440000000E+0001
 4.08446800000000E+0000 1.23805140000000E+0001 2.93200400000000E+0000 1.01688000000000E+0001
 2.66083600000000E+0000 4.61833000000000E+0000 3.77940400000000E+0000 5.09287400000000E+0000
 3.95735800000000E+0000 6.49108400000000E+0000 6.15212400000000E+0000 8.86380400000000E+0000
 2.83879000000000E+0000 6.16907200000000E+0000
 5.60978800000000E+0000 1.02535400000000E+0000 5.50810000000000E+0000 2.73710200000000E+0000
 5.26235400000000E+0000 1.47023900000000E+0001 5.49115200000000E+0000 1.43888520000000E+0001
 5.66910600000000E+0000 1.44058000000000E+0001 5.17761400000000E+0000 1.38210940000000E+0001
 5.46573000000000E+0000 3.35570400000000E+0000 6.28770800000000E+0000 4.16073400000000E+0000
 5.76232000000000E+0000 5.75384600000000E+0000 8.10961800000000E+0000 9.59256800000000E+0000
 5.44030800000000E+0000 6.48261000000000E+0000
 1.18720740000000E+0001 3.30486000000000E+0000 1.15839580000000E+0001 5.28777600000000E+0000
 1.14483740000000E+0001 1.66005660000000E+0001 1.17619120000000E+0001 1.60497560000000E+0001
 1.20330800000000E+0001 1.59904380000000E+0001 1.12534720000000E+0001 1.46515460000000E+0001
 1.14907440000000E+0001 6.19449400000000E+0000 1.27703180000000E+0001 6.92325800000000E+0000
 1.20161320000000E+0001 8.29604600000000E+0000 1.44566440000000E+0001 1.14060040000000E+0001
 1.14907440000000E+0001 8.88075200000000E+0000
 5.07592600000000E+0000 3.04216600000000E+0000 4.89797200000000E+0000 4.83018000000000E+0000
 4.82170600000000E+0000 1.38549900000000E+0001 5.16066600000000E+0000 1.33126540000000E+0001
 5.32167200000000E+0000 1.33634980000000E+0001 4.85560200000000E+0000 1.23550920000000E+0001
 4.82170600000000E+0000 5.38946400000000E+0000 5.99959200000000E+0000 6.27076000000000E+0000
 6.08433200000000E+0000 8.77059000000000E+0000 7.14358200000000E+0000 1.00755860000000E+0001
 4.70307000000000E+0000 7.87234600000000E+0000
 6.27076000000000E+0000 2.03376000000000E+0000 5.99959200000000E+0000 3.83872200000000E+0000
 4.97423800000000E+0000 1.45244360000000E+0001 5.34709400000000E+0000 1.41346320000000E+0001
 5.52504800000000E+0000 1.41939500000000E+0001 4.93186800000000E+0000 1.32194400000000E+0001
 5.88095600000000E+0000 4.54206400000000E+0000 8.33841600000000E+0000 5.89790400000000E+0000
 7.50796400000000E+0000 7.65202200000000E+0000 8.91464800000000E+0000 9.88915800000000E+0000
 5.51657400000000E+0000 6.71988200000000E+0000
 1.28381100000000E+0001 2.26255800000000E+0000 1.26347340000000E+0001 3.88956600000000E+0000
 1.24144100000000E+0001 1.28889540000000E+0001 1.29397980000000E+0001 1.22703520000000E+0001
 1.31516480000000E+0001 1.23381440000000E+0001 1.25330460000000E+0001 1.09653560000000E+0001
 1.26686300000000E+0001 5.12677000000000E+0000 1.49905060000000E+0001 5.79621600000000E+0000
 1.39482040000000E+0001 6.25381200000000E+0000 1.55497900000000E+0001 7.81302800000000E+0000
 1.27448960000000E+0001 6.25381200000000E+0000
 5.19456200000000E+0000 2.61846600000000E+0000 5.06745200000000E+0000 4.82170600000000E+0000
 4.77933600000000E+0000 1.61175480000000E+0001 5.05050400000000E+0000 1.58633280000000E+0001
 5.26235400000000E+0000 1.58463800000000E+0001 4.72001800000000E+0000 1.51430380000000E+0001
 5.04203000000000E+0000 6.40634400000000E+0000 7.44864600000000E+0000 7.40627600000000E+0000
 6.06738400000000E+0000 7.94013800000000E+0000 7.93166400000000E+0000 1.04314940000000E+0001
 4.98271200000000E+0000 8.17741000000000E+0000
 5.09287400000000E+0000 4.26242200000000E+0000 5.40641200000000E+0000 5.66063200000000E+0000
 4.97423800000000E+0000 1.35075560000000E+0001 5.32167200000000E+0000 1.31601220000000E+0001
 5.48267800000000E+0000 1.33126540000000E+0001 5.02508200000000E+0000 1.20839240000000E+0001
 5.44878200000000E+0000 6.39787000000000E+0000 7.49949000000000E+0000 7.17747800000000E+0000
 6.17754600000000E+0000 7.32153600000000E+0000 7.79608000000000E+0000 9.32140000000000E+0000
 5.44030800000000E+0000 7.33848400000000E+0000
 1.19144440000000E+0001 2.75405000000000E+0000 1.18127560000000E+0001 4.36411000000000E+0000
 1.26093120000000E+0001 1.44820660000000E+0001 1.28465840000000E+0001 1.38719380000000E+0001
 1.32194400000000E+0001 1.38295680000000E+0001 1.22110340000000E+0001 1.28720060000000E+0001
 1.17534380000000E+0001 5.01660800000000E+0000 1.39143080000000E+0001 6.25381200000000E+0000
 1.27957400000000E+0001 8.33841600000000E+0000 1.48379740000000E+0001 1.08297720000000E+0001
 1.15839580000000E+0001 8.08419600000000E+0000
 1.38041460000000E+0001 8.98244000000000E-0001 1.35499260000000E+0001 2.39814200000000E+0000
 1.38041460000000E+0001 1.50667720000000E+0001 1.39821000000000E+0001 1.47023900000000E+0001
 1.40498920000000E+0001 1.47023900000000E+0001 1.37787240000000E+0001 1.44142740000000E+0001
 1.35245040000000E+0001 2.99979600000000E+0000 1.52701480000000E+0001 3.79635200000000E+0000
 1.49057660000000E+0001 6.69446000000000E+0000 1.74055960000000E+0001 8.73669400000000E+0000
 1.36007700000000E+0001 6.57582400000000E+0000
 3.73703400000000E+0000 2.83031600000000E+0000 3.62687200000000E+0000 4.49969400000000E+0000
 4.02515000000000E+0000 1.46176500000000E+0001 4.15226000000000E+0000 1.42956380000000E+0001
 4.33868800000000E+0000 1.42956380000000E+0001 3.98278000000000E+0000 1.38126200000000E+0001
 3.55060600000000E+0000 5.27082800000000E+0000 4.58443400000000E+0000 5.79621600000000E+0000
 4.44037600000000E+0000 8.16046200000000E+0000 6.37244800000000E+0000 9.49088000000000E+0000
 3.43197000000000E+0000 8.32146800000000E+0000
 4.80475800000000E+0000 4.01667600000000E+0000 4.77086200000000E+0000 5.83011200000000E+0000
 3.69466400000000E+0000 1.45159620000000E+0001 4.10989000000000E+0000 1.41261580000000E+0001
 4.39800600000000E+0000 1.43125860000000E+0001 3.90651400000000E+0000 1.29228500000000E+0001
 4.65222600000000E+0000 6.86394000000000E+0000 6.94020600000000E+0000 8.57568800000000E+0000
 5.96569600000000E+0000 8.85533000000000E+0000 6.98257600000000E+0000 1.09823040000000E+0001
 4.51664200000000E+0000 8.38926000000000E+0000
 1.15246400000000E+0001 3.16080200000000E+0000 1.15670100000000E+0001 5.10134800000000E+0000
 1.18381780000000E+0001 1.44990140000000E+0001 1.21347680000000E+0001 1.41600540000000E+0001
 1.23720400000000E+0001 1.43295340000000E+0001 1.18381780000000E+0001 1.30838560000000E+0001
 1.16178540000000E+0001 6.17754600000000E+0000 1.42193720000000E+0001 7.23679600000000E+0000
 1.36346660000000E+0001 8.91464800000000E+0000 1.50074540000000E+0001 1.03891240000000E+0001
 1.17619120000000E+0001 8.16046200000000E+0000
 1.10246740000000E+0001 2.44898600000000E+0000 1.11517840000000E+0001 4.18615600000000E+0000
 1.13721080000000E+0001 1.50328760000000E+0001 1.17449640000000E+0001 1.45244360000000E+0001
 1.19822360000000E+0001 1.45498580000000E+0001 1.11602580000000E+0001 1.32872320000000E+0001
 1.11009400000000E+0001 5.10134800000000E+0000 1.25923640000000E+0001 5.55894400000000E+0000
 1.24652540000000E+0001 9.10107600000000E+0000 1.47108640000000E+0001 1.16009060000000E+0001
 1.08806160000000E+0001 8.54179200000000E+0000
 5.38946400000000E+0000 3.77093000000000E+0000 4.99966000000000E+0000 5.44878200000000E+0000
 3.28791200000000E+0000 1.47532340000000E+0001 4.16073400000000E+0000 1.38973600000000E+0001
 4.88102400000000E+0000 1.43295340000000E+0001 3.65229400000000E+0000 1.19737620000000E+0001
 4.74544000000000E+0000 6.21144200000000E+0000 5.80469000000000E+0000 7.28764000000000E+0000
 5.29625000000000E+0000 8.75364200000000E+0000 6.90631000000000E+0000 1.09060380000000E+0001
 4.17768200000000E+0000 8.37231200000000E+0000
 6.11822800000000E+0000 2.68625800000000E+0000 6.01654000000000E+0000 4.27089600000000E+0000
 5.12677000000000E+0000 1.44990140000000E+0001 5.56741800000000E+0000 1.38888860000000E+0001
 5.76232000000000E+0000 1.39482040000000E+0001 5.11829600000000E+0000 1.25754160000000E+0001
 5.97417000000000E+0000 4.98271200000000E+0000 7.45712000000000E+0000 5.90637800000000E+0000
 7.01647200000000E+0000 7.77913200000000E+0000 8.65195400000000E+0000 1.04399680000000E+0001
 5.81316400000000E+0000 7.25374400000000E+0000
 4.94881600000000E+0000 2.41509000000000E+0000 5.01660800000000E+0000 3.41502200000000E+0000
 4.58443400000000E+0000 1.11687320000000E+0001 4.91492000000000E+0000 1.06263960000000E+0001
 5.10982200000000E+0000 1.07365580000000E+0001 4.59290800000000E+0000 9.65188600000000E+0000
 4.99118600000000E+0000 4.22005200000000E+0000 6.28770800000000E+0000 4.77086200000000E+0000
 6.15212400000000E+0000 6.27076000000000E+0000 7.02494600000000E+0000 7.95708600000000E+0000
 4.90644600000000E+0000 5.60978800000000E+0000
 1.30330120000000E+0001 3.84719600000000E+0000 1.29821680000000E+0001 5.10134800000000E+0000
 1.26262600000000E+0001 1.17195420000000E+0001 1.34397640000000E+0001 1.09399340000000E+0001
 1.39482040000000E+0001 1.11009400000000E+0001 1.28381100000000E+0001 8.99091400000000E+0000
 1.29143760000000E+0001 6.13517600000000E+0000 1.46430720000000E+0001 6.91478400000000E+0000
 1.41346320000000E+0001 7.08426400000000E+0000 1.53464140000000E+0001 8.57568800000000E+0000
 1.29059020000000E+0001 6.98257600000000E+0000
 6.18602000000000E+0000 3.03369200000000E+0000 6.10128000000000E+0000 5.04203000000000E+0000
 4.62680400000000E+0000 1.54735240000000E+0001 5.21151000000000E+0000 1.51515120000000E+0001
 5.46573000000000E+0000 1.53040440000000E+0001 5.07592600000000E+0000 1.30753820000000E+0001
 6.07585800000000E+0000 6.07585800000000E+0000 8.61805800000000E+0000 6.86394000000000E+0000
 8.15198800000000E+0000 8.71974600000000E+0000 9.40614000000000E+0000 1.07874020000000E+0001
 5.99959200000000E+0000 7.73676200000000E+0000
 4.61833000000000E+0000 2.67778400000000E+0000 4.71154400000000E+0000 5.08440000000000E+0000
 4.05057200000000E+0000 1.50921940000000E+0001 4.54206400000000E+0000 1.48125520000000E+0001
 4.77933600000000E+0000 1.48464480000000E+0001 4.23700000000000E+0000 1.36685620000000E+0001
 4.70307000000000E+0000 6.34702600000000E+0000 7.21137400000000E+0000 7.94013800000000E+0000
 6.21991600000000E+0000 8.21978000000000E+0000 8.16893600000000E+0000 1.02196440000000E+0001
 4.57596000000000E+0000 7.60965200000000E+0000
 4.75391400000000E+0000 2.27950600000000E+0000 4.68612200000000E+0000 4.02515000000000E+0000
 3.88956600000000E+0000 1.36007700000000E+0001 4.58443400000000E+0000 1.31347000000000E+0001
 4.96576400000000E+0000 1.33380760000000E+0001 3.97430600000000E+0000 1.11094140000000E+0001
 4.64375200000000E+0000 5.17761400000000E+0000 6.83004400000000E+0000 6.21144200000000E+0000
 6.29618200000000E+0000 8.32146800000000E+0000 7.50796400000000E+0000 1.03128580000000E+0001
 4.38105800000000E+0000 7.59270400000000E+0000
 1.07704540000000E+0001 2.49983000000000E+0000 1.10416220000000E+0001 3.83872200000000E+0000
 1.15839580000000E+0001 1.33126540000000E+0001 1.18042820000000E+0001 1.29482720000000E+0001
 1.19822360000000E+0001 1.30753820000000E+0001 1.14992180000000E+0001 1.19991840000000E+0001
 1.10839920000000E+0001 4.44037600000000E+0000 1.24059360000000E+0001 4.94881600000000E+0000
 1.21771380000000E+0001 6.37244800000000E+0000 1.41431060000000E+0001 8.14351400000000E+0000
 1.11433100000000E+0001 6.25381200000000E+0000
 5.34709400000000E+0000 3.38112600000000E+0000 5.48267800000000E+0000 4.11836400000000E+0000
 5.27082800000000E+0000 1.01349040000000E+0001 5.56741800000000E+0000 9.78747000000000E+0000
 5.81316400000000E+0000 9.88068400000000E+0000 5.33862000000000E+0000 8.74516800000000E+0000
 5.45725600000000E+0000 4.49122000000000E+0000 6.38939600000000E+0000 5.01660800000000E+0000
 6.42329200000000E+0000 6.83851800000000E+0000 7.28764000000000E+0000 7.96556000000000E+0000
 5.34709400000000E+0000 6.47413600000000E+0000
 6.20296800000000E+0000 2.99979600000000E+0000 6.06738400000000E+0000 4.20310400000000E+0000
 5.38099000000000E+0000 1.41092100000000E+0001 5.89790400000000E+0000 1.29991160000000E+0001
 6.21144200000000E+0000 1.32702840000000E+0001 5.32167200000000E+0000 1.13127900000000E+0001
 6.00806600000000E+0000 4.70307000000000E+0000 7.07579000000000E+0000 5.31319800000000E+0000
 7.21984800000000E+0000 8.39773400000000E+0000 8.55026600000000E+0000 1.06348700000000E+0001
 5.71147600000000E+0000 7.47406800000000E+0000
 3.94041000000000E+0000 2.60151800000000E+0000 4.03362400000000E+0000 3.59297600000000E+0000
 3.32180800000000E+0000 1.14060040000000E+0001 3.93193600000000E+0000 1.06009740000000E+0001
 4.38105800000000E+0000 1.09484080000000E+0001 3.74550800000000E+0000 8.80448600000000E+0000
 4.02515000000000E+0000 4.05057200000000E+0000 5.14371800000000E+0000 4.44037600000000E+0000
 5.22845800000000E+0000 6.94020600000000E+0000 6.60972000000000E+0000 9.13497200000000E+0000
 3.93193600000000E+0000 6.19449400000000E+0000
 5.44030800000000E+0000 1.70327400000000E+0000 5.49115200000000E+0000 3.40654800000000E+0000
 4.46579800000000E+0000 1.55074200000000E+0001 4.96576400000000E+0000 1.49311880000000E+0001
 5.21998400000000E+0000 1.49905060000000E+0001 4.52511600000000E+0000 1.31008040000000E+0001
 5.49115200000000E+0000 4.06752000000000E+0000 6.94020600000000E+0000 4.64375200000000E+0000
 7.17747800000000E+0000 6.41481800000000E+0000 9.14344600000000E+0000 9.15192000000000E+0000
 5.40641200000000E+0000 6.03348800000000E+0000
 1.23381440000000E+0001 2.07613000000000E+0000 1.23127220000000E+0001 3.66076800000000E+0000
 1.22279820000000E+0001 1.32194400000000E+0001 1.26262600000000E+0001 1.26093120000000E+0001
 1.29059020000000E+0001 1.25754160000000E+0001 1.22110340000000E+0001 1.11009400000000E+0001
 1.22703520000000E+0001 4.46579800000000E+0000 1.45752800000000E+0001 5.73689800000000E+0000
 1.34058680000000E+0001 5.98264400000000E+0000 1.55921600000000E+0001 7.83845000000000E+0000
 1.22703520000000E+0001 6.01654000000000E+0000
 6.77072600000000E+0000 4.29631800000000E+0000 6.74530400000000E+0000 5.76232000000000E+0000
 6.79614800000000E+0000 1.40159960000000E+0001 6.97410200000000E+0000 1.37871980000000E+0001
 7.11816000000000E+0000 1.38295680000000E+0001 6.77072600000000E+0000 1.32618100000000E+0001
 6.72835600000000E+0000 6.27076000000000E+0000 7.66897000000000E+0000 6.79614800000000E+0000
 7.99098200000000E+0000 9.25360800000000E+0000 9.35529600000000E+0000 1.11348360000000E+0001
 6.71988200000000E+0000 9.13497200000000E+0000
 1.15585360000000E+0001 2.49135600000000E+0000 1.14060040000000E+0001 3.53365800000000E+0000
 1.08297720000000E+0001 1.00077940000000E+0001 1.10839920000000E+0001 9.71120400000000E+0000
 1.12534720000000E+0001 9.87221000000000E+0000 1.10162000000000E+0001 9.05870600000000E+0000
 1.13551600000000E+0001 4.36411000000000E+0000 1.30245380000000E+0001 5.27082800000000E+0000
 1.21432420000000E+0001 5.39793800000000E+0000 1.34821340000000E+0001 6.80462200000000E+0000
 1.12873680000000E+0001 5.31319800000000E+0000
 1.17534380000000E+0001 3.26249000000000E+0000 1.17449640000000E+0001 5.28777600000000E+0000
 1.16009060000000E+0001 1.45074880000000E+0001 1.20161320000000E+0001 1.41770020000000E+0001
 1.22110340000000E+0001 1.41431060000000E+0001 1.17025940000000E+0001 1.33126540000000E+0001
 1.16686980000000E+0001 6.33855200000000E+0000 1.28126880000000E+0001 6.93173200000000E+0000
 1.29736940000000E+0001 8.71974600000000E+0000 1.49227140000000E+0001 1.11348360000000E+0001
 1.17025940000000E+0001 8.65195400000000E+0000
 5.81316400000000E+0000 2.74557600000000E+0000 5.62673600000000E+0000 3.75398200000000E+0000
 4.96576400000000E+0000 1.10246740000000E+0001 5.39793800000000E+0000 1.05925000000000E+0001
 5.65215800000000E+0000 1.06687660000000E+0001 4.97423800000000E+0000 9.48240600000000E+0000
 5.50810000000000E+0000 4.22852600000000E+0000 6.31313000000000E+0000 4.79628400000000E+0000
 5.96569600000000E+0000 6.70293400000000E+0000 7.00799800000000E+0000 8.05030000000000E+0000
 5.09287400000000E+0000 6.39787000000000E+0000
 2.43203800000000E+0000 5.19456200000000E+0000 3.98278000000000E+0000 5.04203000000000E+0000
 1.42447940000000E+0001 4.82170600000000E+0000 1.38210940000000E+0001 4.34716200000000E+0000
 1.37956720000000E+0001 4.05904600000000E+0000 1.21517160000000E+0001 4.70307000000000E+0000
 5.04203000000000E+0000 4.94034200000000E+0000 5.60131400000000E+0000 3.07606200000000E+0000
 7.42322400000000E+0000 3.24554200000000E+0000 9.66036000000000E+0000 1.44058000000000E+0000
 7.20290000000000E+0000 4.75391400000000E+0000
 4.81323200000000E+0000 2.14392200000000E+0000 4.61833000000000E+0000 3.90651400000000E+0000
 4.35563600000000E+0000 1.45752800000000E+0001 4.88102400000000E+0000 1.37278800000000E+0001
 5.28777600000000E+0000 1.37278800000000E+0001 4.16073400000000E+0000 1.20754500000000E+0001
 4.55053800000000E+0000 4.51664200000000E+0000 6.12670200000000E+0000 5.43183400000000E+0000
 5.36404200000000E+0000 6.95715400000000E+0000 7.38932800000000E+0000 9.59256800000000E+0000
 4.29631800000000E+0000 7.17747800000000E+0000
 5.96569600000000E+0000 3.57602800000000E+0000 6.01654000000000E+0000 4.78781000000000E+0000
 5.05050400000000E+0000 1.40583660000000E+0001 5.31319800000000E+0000 1.39482040000000E+0001
 5.43183400000000E+0000 1.39821000000000E+0001 5.27930200000000E+0000 1.33804460000000E+0001
 5.92332600000000E+0000 5.80469000000000E+0000 7.96556000000000E+0000 6.89783600000000E+0000
 7.07579000000000E+0000 7.20290000000000E+0000 8.56721400000000E+0000 9.28750400000000E+0000
 5.88095600000000E+0000 6.97410200000000E+0000
 1.20246060000000E+0001 2.60999200000000E+0000 1.20330800000000E+0001 3.58450200000000E+0000
 1.19991840000000E+0001 1.00162680000000E+0001 1.23127220000000E+0001 9.64341200000000E+0000
 1.25160980000000E+0001 9.66883400000000E+0000 1.19144440000000E+0001 8.93159600000000E+0000
 1.19991840000000E+0001 4.40648000000000E+0000 1.39736260000000E+0001 5.20303600000000E+0000
 1.33211280000000E+0001 5.40641200000000E+0000 1.43210600000000E+0001 6.69446000000000E+0000
 1.19652880000000E+0001 5.21151000000000E+0000
 1.19398660000000E+0001 2.11002600000000E+0000 1.16517500000000E+0001 4.46579800000000E+0000
 1.15415880000000E+0001 1.51430380000000E+0001 1.19991840000000E+0001 1.46261240000000E+0001
 1.25330460000000E+0001 1.48633960000000E+0001 1.15076920000000E+0001 1.25499940000000E+0001
 1.16178540000000E+0001 5.63521000000000E+0000 1.39397300000000E+0001 6.97410200000000E+0000
 1.31262260000000E+0001 8.53331800000000E+0000 1.53718360000000E+0001 1.02789620000000E+0001
 1.16093800000000E+0001 8.25367600000000E+0000
 4.73696600000000E+0000 2.84726400000000E+0000 4.63527800000000E+0000 4.20310400000000E+0000
 3.38960000000000E+0000 1.54904720000000E+0001 3.84719600000000E+0000 1.50667720000000E+0001
 4.15226000000000E+0000 1.52277780000000E+0001 3.62687200000000E+0000 1.35753480000000E+0001
 4.58443400000000E+0000 4.74544000000000E+0000 5.84706000000000E+0000 5.46573000000000E+0000
 5.44030800000000E+0000 8.35536400000000E+0000 7.28764000000000E+0000 1.11009400000000E+0001
 4.20310400000000E+0000 8.09267000000000E+0000
 6.33855200000000E+0000 3.10995800000000E+0000 6.49955800000000E+0000 4.50816800000000E+0000
 6.77072600000000E+0000 1.32618100000000E+0001 7.26221800000000E+0000 1.26177860000000E+0001
 7.55880800000000E+0000 1.26771040000000E+0001 6.75377800000000E+0000 1.16517500000000E+0001
 6.51650600000000E+0000 4.88102400000000E+0000 7.56728200000000E+0000 5.77926800000000E+0000
 7.56728200000000E+0000 7.05036800000000E+0000 9.71967800000000E+0000 9.31292600000000E+0000
 6.57582400000000E+0000 6.53345400000000E+0000
 4.82170600000000E+0000 1.77954000000000E+0000 4.71154400000000E+0000 3.05911400000000E+0000
 4.62680400000000E+0000 1.02535400000000E+0001 4.84712800000000E+0000 1.00671120000000E+0001
 4.93186800000000E+0000 1.01264300000000E+0001 4.72001800000000E+0000 9.60951600000000E+0000
 4.68612200000000E+0000 3.44891800000000E+0000 5.62673600000000E+0000 3.97430600000000E+0000
 5.83858600000000E+0000 6.36397400000000E+0000 6.84699200000000E+0000 7.77065800000000E+0000
 4.63527800000000E+0000 5.61826200000000E+0000
 1.25330460000000E+0001 2.71168000000000E+0000 1.24059360000000E+0001 4.27089600000000E+0000
 1.19822360000000E+0001 1.47278120000000E+0001 1.23974620000000E+0001 1.42193720000000E+0001
 1.27957400000000E+0001 1.43888520000000E+0001 1.18636000000000E+0001 1.25330460000000E+0001
 1.23635660000000E+0001 5.03355600000000E+0000 1.35499260000000E+0001 5.73689800000000E+0000
 1.31008040000000E+0001 8.95701800000000E+0000 1.51599860000000E+0001 1.23042480000000E+0001
 1.20246060000000E+0001 8.55874000000000E+0000
 1.32787580000000E+0001 2.72862800000000E+0000 1.32024920000000E+0001 4.10989000000000E+0000
 1.19313920000000E+0001 1.39058340000000E+0001 1.22449300000000E+0001 1.35668740000000E+0001
 1.24144100000000E+0001 1.36516140000000E+0001 1.21008720000000E+0001 1.27448960000000E+0001
 1.30414860000000E+0001 4.97423800000000E+0000 1.40753140000000E+0001 5.82163800000000E+0000
 1.35838220000000E+0001 7.46559400000000E+0000 1.50328760000000E+0001 9.45698400000000E+0000
 1.26686300000000E+0001 7.14358200000000E+0000
 1.20754500000000E+0001 3.74550800000000E+0000 1.19822360000000E+0001 5.42336000000000E+0000
 1.21178200000000E+0001 1.48803440000000E+0001 1.26601560000000E+0001 1.39143080000000E+0001
 1.31262260000000E+0001 1.39905740000000E+0001 1.19059700000000E+0001 1.22873000000000E+0001
 1.19652880000000E+0001 6.39787000000000E+0000 1.34906080000000E+0001 7.25374400000000E+0000
 1.31008040000000E+0001 9.10107600000000E+0000 1.50667720000000E+0001 1.15839580000000E+0001
 1.18551260000000E+0001 9.12649800000000E+0000
 4.22852600000000E+0000 2.55067400000000E+0000 4.10989000000000E+0000 4.60138200000000E+0000
 3.62687200000000E+0000 1.55836860000000E+0001 4.10989000000000E+0000 1.49481360000000E+0001
 4.23700000000000E+0000 1.50413500000000E+0001 3.75398200000000E+0000 1.38549900000000E+0001
 4.14378600000000E+0000 5.81316400000000E+0000 5.61826200000000E+0000 6.75377800000000E+0000
 4.92339400000000E+0000 7.15205600000000E+0000 7.21137400000000E+0000 9.16039400000000E+0000
 4.14378600000000E+0000 7.28764000000000E+0000
 1.16009060000000E+0001 2.69473200000000E+0000 1.17534380000000E+0001 4.48274600000000E+0000
 1.20585020000000E+0001 1.40753140000000E+0001 1.23805140000000E+0001 1.36600880000000E+0001
 1.26008380000000E+0001 1.37024580000000E+0001 1.20754500000000E+0001 1.25669420000000E+0001
 1.18212300000000E+0001 5.22845800000000E+0000 1.34058680000000E+0001 5.46573000000000E+0000
 1.26177860000000E+0001 6.97410200000000E+0000 1.52616740000000E+0001 9.03328400000000E+0000
 1.20246060000000E+0001 7.38085400000000E+0000
 1.20585020000000E+0001 2.43203800000000E+0000 1.20669760000000E+0001 4.14378600000000E+0000
 1.18381780000000E+0001 1.42278460000000E+0001 1.21771380000000E+0001 1.38719380000000E+0001
 1.23974620000000E+0001 1.39058340000000E+0001 1.20161320000000E+0001 1.29652200000000E+0001
 1.20585020000000E+0001 5.01660800000000E+0000 1.32109660000000E+0001 5.80469000000000E+0000
 1.27872660000000E+0001 7.15205600000000E+0000 1.49566100000000E+0001 8.99091400000000E+0000
 1.20923980000000E+0001 7.32153600000000E+0000
 3.62687200000000E+0000 2.86421200000000E+0000 3.85567000000000E+0000 4.52511600000000E+0000
 3.51671000000000E+0000 1.58379060000000E+0001 3.83872200000000E+0000 1.54057320000000E+0001
 4.03362400000000E+0000 1.54481020000000E+0001 3.54213200000000E+0000 1.42956380000000E+0001
 3.90651400000000E+0000 5.29625000000000E+0000 5.79621600000000E+0000 6.05891000000000E+0000
 5.23693200000000E+0000 8.27909800000000E+0000 7.48254200000000E+0000 1.11094140000000E+0001
 3.93193600000000E+0000 8.18588400000000E+0000
 1.17703860000000E+0001 2.39814200000000E+0000 1.18551260000000E+0001 3.83024800000000E+0000
 1.25330460000000E+0001 1.30245380000000E+0001 1.28296360000000E+0001 1.26093120000000E+0001
 1.30160640000000E+0001 1.26432080000000E+0001 1.23805140000000E+0001 1.15246400000000E+0001
 1.18720740000000E+0001 4.73696600000000E+0000 1.29059020000000E+0001 5.17761400000000E+0000
 1.37278800000000E+0001 8.15198800000000E+0000 1.48633960000000E+0001 1.00586380000000E+0001
 1.21262940000000E+0001 7.94013800000000E+0000
 6.88936200000000E+0000 4.66070000000000E+0000 6.63514200000000E+0000 6.41481800000000E+0000
 6.49955800000000E+0000 1.41515800000000E+0001 6.71140800000000E+0000 1.37617760000000E+0001
 6.91478400000000E+0000 1.38888860000000E+0001 6.27923400000000E+0000 1.25330460000000E+0001
 6.55040200000000E+0000 7.04189400000000E+0000 7.59270400000000E+0000 7.79608000000000E+0000
 7.26221800000000E+0000 8.94007000000000E+0000 8.94007000000000E+0000 1.10331480000000E+0001
 6.30465600000000E+0000 8.76211600000000E+0000
 1.22703520000000E+0001 2.94895200000000E+0000 1.23466180000000E+0001 4.66070000000000E+0000
 1.31516480000000E+0001 1.21093460000000E+0001 1.33973940000000E+0001 1.18381780000000E+0001
 1.36261920000000E+0001 1.18636000000000E+0001 1.29821680000000E+0001 1.07958760000000E+0001
 1.24144100000000E+0001 5.64368400000000E+0000 1.39651520000000E+0001 6.16907200000000E+0000
 1.41176840000000E+0001 8.09267000000000E+0000 1.50413500000000E+0001 9.02481000000000E+0000
 1.26093120000000E+0001 7.76218400000000E+0000
 5.00813400000000E+0000 4.97423800000000E+0000 5.13524400000000E+0000 6.13517600000000E+0000
 5.49962600000000E+0000 1.39227820000000E+0001 5.96569600000000E+0000 1.34567120000000E+0001
 6.12670200000000E+0000 1.35499260000000E+0001 5.55894400000000E+0000 1.23127220000000E+0001
 5.16066600000000E+0000 7.14358200000000E+0000 7.28764000000000E+0000 7.82150200000000E+0000
 6.33007800000000E+0000 8.24520200000000E+0000 7.83845000000000E+0000 9.64341200000000E+0000
 5.25388000000000E+0000 8.20283200000000E+0000
 5.83011200000000E+0000 2.31340200000000E+0000 5.73689800000000E+0000 3.39807400000000E+0000
 5.31319800000000E+0000 1.19144440000000E+0001 5.97417000000000E+0000 1.13890560000000E+0001
 6.35550000000000E+0000 1.15585360000000E+0001 5.38946400000000E+0000 9.47393200000000E+0000
 5.73689800000000E+0000 4.20310400000000E+0000 7.33001000000000E+0000 4.67764800000000E+0000
 6.96562800000000E+0000 6.16059800000000E+0000 8.44010400000000E+0000 7.71134000000000E+0000
 5.68605400000000E+0000 5.75384600000000E+0000
 4.49969400000000E+0000 4.09294200000000E+0000 4.22005200000000E+0000 5.77926800000000E+0000
 4.10141600000000E+0000 1.41770020000000E+0001 4.45732400000000E+0000 1.40753140000000E+0001
 4.72001800000000E+0000 1.40668400000000E+0001 4.10989000000000E+0000 1.27194740000000E+0001
 4.20310400000000E+0000 6.39787000000000E+0000 5.36404200000000E+0000 6.99105000000000E+0000
 5.04203000000000E+0000 8.51637000000000E+0000 6.71140800000000E+0000 1.02874360000000E+0001
 4.17768200000000E+0000 8.27909800000000E+0000
 1.23296700000000E+0001 2.48288200000000E+0000 1.20415540000000E+0001 4.57596000000000E+0000
 1.22279820000000E+0001 1.40837880000000E+0001 1.26855780000000E+0001 1.37871980000000E+0001
 1.30160640000000E+0001 1.37533020000000E+0001 1.21432420000000E+0001 1.20669760000000E+0001
 1.19991840000000E+0001 5.16066600000000E+0000 1.37533020000000E+0001 5.78774200000000E+0000
 1.34058680000000E+0001 7.66049600000000E+0000 1.59141720000000E+0001 9.68578200000000E+0000
 1.19398660000000E+0001 7.28764000000000E+0000
 1.25584680000000E+0001 6.38939600000000E+0000 1.24567800000000E+0001 7.27069200000000E+0000
 1.20754500000000E+0001 1.40498920000000E+0001 1.25076240000000E+0001 1.36855100000000E+0001
 1.28211620000000E+0001 1.38719380000000E+0001 1.23550920000000E+0001 1.24737280000000E+0001
 1.24228840000000E+0001 7.61812600000000E+0000 1.32363880000000E+0001 8.10114400000000E+0000
 1.35584000000000E+0001 1.00671120000000E+0001 1.48464480000000E+0001 1.13466860000000E+0001
 1.23805140000000E+0001 9.69425600000000E+0000
 5.27930200000000E+0000 2.10155200000000E+0000 5.07592600000000E+0000 3.07606200000000E+0000
 4.42342800000000E+0000 1.15415880000000E+0001 4.83865400000000E+0000 1.07874020000000E+0001
 5.14371800000000E+0000 1.11433100000000E+0001 4.47427200000000E+0000 9.09260200000000E+0000
 5.01660800000000E+0000 3.65229400000000E+0000 6.53345400000000E+0000 4.32174000000000E+0000
 6.16059800000000E+0000 5.98264400000000E+0000 7.80455400000000E+0000 7.46559400000000E+0000
 4.80475800000000E+0000 5.38946400000000E+0000
 5.65215800000000E+0000 4.41495400000000E+0000 5.90637800000000E+0000 5.83011200000000E+0000
 5.67758000000000E+0000 1.34228160000000E+0001 6.13517600000000E+0000 1.29652200000000E+0001
 6.44024000000000E+0000 1.31262260000000E+0001 5.83858600000000E+0000 1.14653220000000E+0001
 5.90637800000000E+0000 6.67751200000000E+0000 7.63507400000000E+0000 7.93166400000000E+0000
 6.90631000000000E+0000 7.75371000000000E+0000 8.53331800000000E+0000 9.71120400000000E+0000
 5.93180000000000E+0000 7.78760600000000E+0000
 1.11094140000000E+0001 1.76259200000000E+0000 1.12704200000000E+0001 3.35570400000000E+0000
 1.33550240000000E+0001 1.13212640000000E+0001 1.35753480000000E+0001 1.08551940000000E+0001
 1.38380420000000E+0001 1.09145120000000E+0001 1.27533700000000E+0001 9.71120400000000E+0000
 1.14144780000000E+0001 3.89804000000000E+0000 1.29652200000000E+0001 3.99972800000000E+0000
 1.27957400000000E+0001 5.58436600000000E+0000 1.51430380000000E+0001 7.19442600000000E+0000
 1.17534380000000E+0001 5.54199600000000E+0000
 1.10331480000000E+0001 2.44051200000000E+0000 1.11602580000000E+0001 4.19463000000000E+0000
 1.13721080000000E+0001 1.50328760000000E+0001 1.17364900000000E+0001 1.45413840000000E+0001
 1.19907100000000E+0001 1.45413840000000E+0001 1.11602580000000E+0001 1.32957060000000E+0001
 1.11009400000000E+0001 5.14371800000000E+0000 1.25838900000000E+0001 5.57589200000000E+0000
 1.24822020000000E+0001 9.10107600000000E+0000 1.47108640000000E+0001 1.15924320000000E+0001
 1.08890900000000E+0001 8.55026600000000E+0000
 5.37251600000000E+0000 3.80482600000000E+0000 4.99966000000000E+0000 5.40641200000000E+0000
 3.28791200000000E+0000 1.47617080000000E+0001 4.17768200000000E+0000 1.38973600000000E+0001
 4.88949800000000E+0000 1.43295340000000E+0001 3.66076800000000E+0000 1.19737620000000E+0001
 4.75391400000000E+0000 6.21991600000000E+0000 5.80469000000000E+0000 7.27916600000000E+0000
 5.31319800000000E+0000 8.73669400000000E+0000 6.89783600000000E+0000 1.08890900000000E+0001
 4.17768200000000E+0000 8.46552600000000E+0000
 6.12670200000000E+0000 2.68625800000000E+0000 6.03348800000000E+0000 4.22852600000000E+0000
 5.13524400000000E+0000 1.45159620000000E+0001 5.55894400000000E+0000 1.38804120000000E+0001
 5.78774200000000E+0000 1.39482040000000E+0001 5.10134800000000E+0000 1.25838900000000E+0001
 5.99111800000000E+0000 4.99966000000000E+0000 7.44864600000000E+0000 5.90637800000000E+0000
 6.99952400000000E+0000 7.80455400000000E+0000 8.64348000000000E+0000 1.04484420000000E+0001
 5.80469000000000E+0000 7.24527000000000E+0000
 4.93186800000000E+0000 2.40661600000000E+0000 5.00813400000000E+0000 3.44044400000000E+0000
 4.57596000000000E+0000 1.11602580000000E+0001 4.90644600000000E+0000 1.06179220000000E+0001
 5.12677000000000E+0000 1.07280840000000E+0001 4.59290800000000E+0000 9.66036000000000E+0000
 4.99118600000000E+0000 4.17768200000000E+0000 6.29618200000000E+0000 4.76238800000000E+0000
 6.14365000000000E+0000 6.27076000000000E+0000 7.01647200000000E+0000 7.96556000000000E+0000
 4.91492000000000E+0000 5.60978800000000E+0000
 1.30414860000000E+0001 3.86414400000000E+0000 1.29821680000000E+0001 5.08440000000000E+0000
 1.26262600000000E+0001 1.17110680000000E+0001 1.34397640000000E+0001 1.09314600000000E+0001
 1.39143080000000E+0001 1.11009400000000E+0001 1.28381100000000E+0001 8.99091400000000E+0000
 1.29228500000000E+0001 6.13517600000000E+0000 1.46515460000000E+0001 6.90631000000000E+0000
 1.41176840000000E+0001 7.09273800000000E+0000 1.53633620000000E+0001 8.54179200000000E+0000
 1.28889540000000E+0001 6.96562800000000E+0000
 6.17754600000000E+0000 3.01674400000000E+0000 6.12670200000000E+0000 4.91492000000000E+0000
 4.63527800000000E+0000 1.54819980000000E+0001 5.21151000000000E+0000 1.51684600000000E+0001
 5.45725600000000E+0000 1.53040440000000E+0001 5.07592600000000E+0000 1.30838560000000E+0001
 6.08433200000000E+0000 6.06738400000000E+0000 8.62653200000000E+0000 6.86394000000000E+0000
 8.16893600000000E+0000 8.70279800000000E+0000 9.39766600000000E+0000 1.07789280000000E+0001
 6.00806600000000E+0000 7.64354800000000E+0000
 4.64375200000000E+0000 2.70320600000000E+0000 4.72849200000000E+0000 5.07592600000000E+0000
 4.05904600000000E+0000 1.50837200000000E+0001 4.56748600000000E+0000 1.48210260000000E+0001
 4.78781000000000E+0000 1.48379740000000E+0001 4.22852600000000E+0000 1.36431400000000E+0001
 4.72001800000000E+0000 6.36397400000000E+0000 7.21137400000000E+0000 7.92319000000000E+0000
 6.24533800000000E+0000 8.20283200000000E+0000 8.12656600000000E+0000 1.02365920000000E+0001
 4.57596000000000E+0000 7.63507400000000E+0000
 4.77086200000000E+0000 2.28798000000000E+0000 4.67764800000000E+0000 4.05057200000000E+0000
 3.88956600000000E+0000 1.36092440000000E+0001 4.57596000000000E+0000 1.31347000000000E+0001
 4.99118600000000E+0000 1.33296020000000E+0001 3.98278000000000E+0000 1.10924660000000E+0001
 4.64375200000000E+0000 5.21151000000000E+0000 6.84699200000000E+0000 6.18602000000000E+0000
 6.30465600000000E+0000 8.32146800000000E+0000 7.49949000000000E+0000 1.02704880000000E+0001
 4.39800600000000E+0000 7.60965200000000E+0000
 1.07704540000000E+0001 2.49135600000000E+0000 1.10416220000000E+0001 3.85567000000000E+0000
 1.15754840000000E+0001 1.33041800000000E+0001 1.17873340000000E+0001 1.29736940000000E+0001
 1.19737620000000E+0001 1.30499600000000E+0001 1.14907440000000E+0001 1.19991840000000E+0001
 1.10839920000000E+0001 4.44037600000000E+0000 1.23974620000000E+0001 4.96576400000000E+0000
 1.21856120000000E+0001 6.38092200000000E+0000 1.41431060000000E+0001 8.11809200000000E+0000
 1.11433100000000E+0001 6.21991600000000E+0000
 5.34709400000000E+0000 3.36417800000000E+0000 5.49115200000000E+0000 4.06752000000000E+0000
 5.26235400000000E+0000 1.01433780000000E+0001 5.55894400000000E+0000 9.77899600000000E+0000
 5.83011200000000E+0000 9.86373600000000E+0000 5.34709400000000E+0000 8.74516800000000E+0000
 5.45725600000000E+0000 4.50816800000000E+0000 6.38939600000000E+0000 4.99966000000000E+0000
 6.44024000000000E+0000 6.80462200000000E+0000 7.27916600000000E+0000 7.94861200000000E+0000
 5.34709400000000E+0000 6.44024000000000E+0000
 6.21991600000000E+0000 2.99979600000000E+0000 6.06738400000000E+0000 4.22852600000000E+0000
 5.40641200000000E+0000 1.41176840000000E+0001 5.89790400000000E+0000 1.29821680000000E+0001
 6.23686400000000E+0000 1.32533360000000E+0001 5.33014600000000E+0000 1.13043160000000E+0001
 6.00806600000000E+0000 4.71154400000000E+0000 7.10121200000000E+0000 5.28777600000000E+0000
 7.21984800000000E+0000 8.40620800000000E+0000 8.55026600000000E+0000 1.06263960000000E+0001
 5.71995000000000E+0000 7.48254200000000E+0000
 3.94888400000000E+0000 2.58457000000000E+0000 4.03362400000000E+0000 3.54213200000000E+0000
 3.33875600000000E+0000 1.13975300000000E+0001 3.95735800000000E+0000 1.06179220000000E+0001
 4.38953200000000E+0000 1.09314600000000E+0001 3.74550800000000E+0000 8.79601200000000E+0000
 4.04209800000000E+0000 4.05904600000000E+0000 5.11829600000000E+0000 4.43190200000000E+0000
 5.22845800000000E+0000 6.92325800000000E+0000 6.60124600000000E+0000 9.11802400000000E+0000
 3.92346200000000E+0000 6.22839000000000E+0000
 5.44878200000000E+0000 1.70327400000000E+0000 5.49962600000000E+0000 3.43197000000000E+0000
 4.47427200000000E+0000 1.55158940000000E+0001 4.97423800000000E+0000 1.49227140000000E+0001
 5.21998400000000E+0000 1.49735580000000E+0001 4.52511600000000E+0000 1.30669080000000E+0001
 5.49115200000000E+0000 4.07599400000000E+0000 6.98257600000000E+0000 4.60985600000000E+0000
 7.16900400000000E+0000 6.41481800000000E+0000 9.13497200000000E+0000 9.15192000000000E+0000
 5.40641200000000E+0000 6.02501400000000E+0000
 1.23466180000000E+0001 2.08460400000000E+0000 1.22957740000000E+0001 3.66924200000000E+0000
 1.22449300000000E+0001 1.32279140000000E+0001 1.26516820000000E+0001 1.25923640000000E+0001
 1.28889540000000E+0001 1.25838900000000E+0001 1.22110340000000E+0001 1.10585700000000E+0001
 1.22788260000000E+0001 4.50816800000000E+0000 1.45752800000000E+0001 5.71147600000000E+0000
 1.34058680000000E+0001 5.98264400000000E+0000 1.55752120000000E+0001 7.85539800000000E+0000
 1.22788260000000E+0001 6.01654000000000E+0000
 6.77072600000000E+0000 4.31326600000000E+0000 6.74530400000000E+0000 5.76232000000000E+0000
 6.78767400000000E+0000 1.40075220000000E+0001 6.98257600000000E+0000 1.37787240000000E+0001
 7.11816000000000E+0000 1.38295680000000E+0001 6.76225200000000E+0000 1.32618100000000E+0001
 6.73683000000000E+0000 6.24533800000000E+0000 7.66049600000000E+0000 6.78767400000000E+0000
 8.00793000000000E+0000 9.23666000000000E+0000 9.36377000000000E+0000 1.11348360000000E+0001
 6.70293400000000E+0000 9.07565400000000E+0000
 1.15331140000000E+0001 2.49983000000000E+0000 1.14060040000000E+0001 3.60145000000000E+0000
 1.08382460000000E+0001 1.00162680000000E+0001 1.10839920000000E+0001 9.71120400000000E+0000
 1.12365240000000E+0001 9.86373600000000E+0000 1.10162000000000E+0001 9.06718000000000E+0000
 1.13551600000000E+0001 4.38953200000000E+0000 1.30160640000000E+0001 5.27930200000000E+0000
 1.21178200000000E+0001 5.37251600000000E+0000 1.34821340000000E+0001 6.78767400000000E+0000
 1.12958420000000E+0001 5.33862000000000E+0000
 1.17280160000000E+0001 3.27943800000000E+0000 1.17449640000000E+0001 5.28777600000000E+0000
 1.15839580000000E+0001 1.44990140000000E+0001 1.20161320000000E+0001 1.41770020000000E+0001
 1.22110340000000E+0001 1.41685280000000E+0001 1.16941200000000E+0001 1.33041800000000E+0001
 1.16941200000000E+0001 6.35550000000000E+0000 1.28126880000000E+0001 6.92325800000000E+0000
 1.29482720000000E+0001 8.72822000000000E+0000 1.49142400000000E+0001 1.11263620000000E+0001
 1.17110680000000E+0001 8.66042800000000E+0000
 5.80469000000000E+0000 2.73710200000000E+0000 5.61826200000000E+0000 3.72008600000000E+0000
 4.98271200000000E+0000 1.10331480000000E+0001 5.39793800000000E+0000 1.05840260000000E+0001
 5.66063200000000E+0000 1.06602920000000E+0001 4.97423800000000E+0000 9.47393200000000E+0000
 5.49115200000000E+0000 4.23700000000000E+0000 6.32160400000000E+0000 4.79628400000000E+0000
 5.94874800000000E+0000 6.72835600000000E+0000 6.98257600000000E+0000 8.03335200000000E+0000
 5.07592600000000E+0000 6.40634400000000E+0000
 2.40661600000000E+0000 5.20303600000000E+0000 3.98278000000000E+0000 5.05050400000000E+0000
 1.42532680000000E+0001 4.82170600000000E+0000 1.37956720000000E+0001 4.35563600000000E+0000
 1.37871980000000E+0001 4.05904600000000E+0000 1.21432420000000E+0001 4.70307000000000E+0000
 5.02508200000000E+0000 4.92339400000000E+0000 5.59284000000000E+0000 3.10995800000000E+0000
 7.41475000000000E+0000 3.24554200000000E+0000 9.66883400000000E+0000 1.42363200000000E+0000
 7.24527000000000E+0000 4.73696600000000E+0000
 4.79628400000000E+0000 2.16087000000000E+0000 4.62680400000000E+0000 3.83872200000000E+0000
 4.36411000000000E+0000 1.45668060000000E+0001 4.88949800000000E+0000 1.37278800000000E+0001
 5.27082800000000E+0000 1.37278800000000E+0001 4.16073400000000E+0000 1.20923980000000E+0001
 4.55053800000000E+0000 4.55901200000000E+0000 6.12670200000000E+0000 5.42336000000000E+0000
 5.37251600000000E+0000 6.95715400000000E+0000 7.38932800000000E+0000 9.58409400000000E+0000
 4.28784400000000E+0000 7.16900400000000E+0000
 5.95722200000000E+0000 3.57602800000000E+0000 6.02501400000000E+0000 4.81323200000000E+0000
 5.05050400000000E+0000 1.40583660000000E+0001 5.30472400000000E+0000 1.39397300000000E+0001
 5.42336000000000E+0000 1.39821000000000E+0001 5.27082800000000E+0000 1.33973940000000E+0001
 5.92332600000000E+0000 5.78774200000000E+0000 7.95708600000000E+0000 6.89783600000000E+0000
 7.07579000000000E+0000 7.17747800000000E+0000 8.57568800000000E+0000 9.29597800000000E+0000
 5.88943000000000E+0000 6.97410200000000E+0000
 1.20076580000000E+0001 2.59304400000000E+0000 1.20330800000000E+0001 3.61839800000000E+0000
 1.19991840000000E+0001 1.00247420000000E+0001 1.23042480000000E+0001 9.65188600000000E+0000
 1.25245720000000E+0001 9.66883400000000E+0000 1.19059700000000E+0001 8.93159600000000E+0000
 1.20076580000000E+0001 4.42342800000000E+0000 1.39651520000000E+0001 5.19456200000000E+0000
 1.32872320000000E+0001 5.43183400000000E+0000 1.43210600000000E+0001 6.71988200000000E+0000
 1.19652880000000E+0001 5.23693200000000E+0000
 1.19313920000000E+0001 2.11002600000000E+0000 1.16517500000000E+0001 4.48274600000000E+0000
 1.15331140000000E+0001 1.51515120000000E+0001 1.19907100000000E+0001 1.46345980000000E+0001
 1.25245720000000E+0001 1.48464480000000E+0001 1.15076920000000E+0001 1.25415200000000E+0001
 1.16009060000000E+0001 5.67758000000000E+0000 1.39312560000000E+0001 6.94868000000000E+0000
 1.31262260000000E+0001 8.53331800000000E+0000 1.53718360000000E+0001 1.03043840000000E+0001
 1.16178540000000E+0001 8.26215000000000E+0000
 4.74544000000000E+0000 2.83879000000000E+0000 4.61833000000000E+0000 4.22005200000000E+0000
 3.38960000000000E+0000 1.54904720000000E+0001 3.86414400000000E+0000 1.50582980000000E+0001
 4.16073400000000E+0000 1.52193040000000E+0001 3.63534600000000E+0000 1.35753480000000E+0001
 4.59290800000000E+0000 4.67764800000000E+0000 5.84706000000000E+0000 5.45725600000000E+0000
 5.44030800000000E+0000 8.35536400000000E+0000 7.29611400000000E+0000 1.11178880000000E+0001
 4.21157800000000E+0000 8.07572200000000E+0000
 6.33007800000000E+0000 3.10148400000000E+0000 6.49108400000000E+0000 4.50816800000000E+0000
 6.77072600000000E+0000 1.32533360000000E+0001 7.26221800000000E+0000 1.26093120000000E+0001
 7.55880800000000E+0000 1.26940520000000E+0001 6.76225200000000E+0000 1.16517500000000E+0001
 6.52498000000000E+0000 4.91492000000000E+0000 7.57575600000000E+0000 5.78774200000000E+0000
 7.55880800000000E+0000 7.05036800000000E+0000 9.73662600000000E+0000 9.30445200000000E+0000
 6.58429800000000E+0000 6.55887600000000E+0000
 4.83865400000000E+0000 1.76259200000000E+0000 4.72001800000000E+0000 3.04216600000000E+0000
 4.61833000000000E+0000 1.02450660000000E+0001 4.83865400000000E+0000 1.00671120000000E+0001
 4.93186800000000E+0000 1.01179560000000E+0001 4.72001800000000E+0000 9.58409400000000E+0000
 4.69459600000000E+0000 3.47434000000000E+0000 5.60978800000000E+0000 4.00820200000000E+0000
 5.83858600000000E+0000 6.35550000000000E+0000 6.83851800000000E+0000 7.76218400000000E+0000
 4.62680400000000E+0000 5.61826200000000E+0000
 1.25330460000000E+0001 2.72015400000000E+0000 1.24059360000000E+0001 4.30479200000000E+0000
 1.19907100000000E+0001 1.47108640000000E+0001 1.23974620000000E+0001 1.42108980000000E+0001
 1.27787920000000E+0001 1.43719040000000E+0001 1.18636000000000E+0001 1.25330460000000E+0001
 1.23635660000000E+0001 5.03355600000000E+0000 1.35414520000000E+0001 5.73689800000000E+0000
 1.31008040000000E+0001 8.95701800000000E+0000 1.51515120000000E+0001 1.22957740000000E+0001
 1.20415540000000E+0001 8.54179200000000E+0000
 1.32702840000000E+0001 2.72862800000000E+0000 1.32024920000000E+0001 4.11836400000000E+0000
 1.19313920000000E+0001 1.39143080000000E+0001 1.22534040000000E+0001 1.35584000000000E+0001
 1.24059360000000E+0001 1.36431400000000E+0001 1.21008720000000E+0001 1.27364220000000E+0001
 1.30414860000000E+0001 4.96576400000000E+0000 1.40753140000000E+0001 5.82163800000000E+0000
 1.35922960000000E+0001 7.44864600000000E+0000 1.50582980000000E+0001 9.44851000000000E+0000
 1.26686300000000E+0001 7.14358200000000E+0000
 1.20669760000000E+0001 3.76245600000000E+0000 1.19822360000000E+0001 5.38946400000000E+0000
 1.21093460000000E+0001 1.48972920000000E+0001 1.26432080000000E+0001 1.39227820000000E+0001
 1.31347000000000E+0001 1.39905740000000E+0001 1.19144440000000E+0001 1.23042480000000E+0001
 1.19568140000000E+0001 6.38092200000000E+0000 1.34990820000000E+0001 7.22832200000000E+0000
 1.31008040000000E+0001 9.12649800000000E+0000 1.50667720000000E+0001 1.15754840000000E+0001
 1.18636000000000E+0001 9.13497200000000E+0000
 4.20310400000000E+0000 2.57609600000000E+0000 4.10989000000000E+0000 4.63527800000000E+0000
 3.62687200000000E+0000 1.55752120000000E+0001 4.10989000000000E+0000 1.49396620000000E+0001
 4.23700000000000E+0000 1.50244020000000E+0001 3.76245600000000E+0000 1.38295680000000E+0001
 4.13531200000000E+0000 5.79621600000000E+0000 5.60978800000000E+0000 6.74530400000000E+0000
 4.92339400000000E+0000 7.15205600000000E+0000 7.21137400000000E+0000 9.15192000000000E+0000
 4.14378600000000E+0000 7.27069200000000E+0000
 1.15924320000000E+0001 2.69473200000000E+0000 1.17534380000000E+0001 4.45732400000000E+0000
 1.20585020000000E+0001 1.40668400000000E+0001 1.23635660000000E+0001 1.36685620000000E+0001
 1.26262600000000E+0001 1.37024580000000E+0001 1.20839240000000E+0001 1.25669420000000E+0001
 1.18297040000000E+0001 5.21151000000000E+0000 1.34143420000000E+0001 5.46573000000000E+0000
 1.26262600000000E+0001 6.99952400000000E+0000 1.52616740000000E+0001 9.02481000000000E+0000
 1.20330800000000E+0001 7.38085400000000E+0000
 1.20754500000000E+0001 2.42356400000000E+0000 1.20754500000000E+0001 4.12683800000000E+0000
 1.18381780000000E+0001 1.42278460000000E+0001 1.21856120000000E+0001 1.38804120000000E+0001
 1.24059360000000E+0001 1.39143080000000E+0001 1.20246060000000E+0001 1.29821680000000E+0001
 1.20585020000000E+0001 4.98271200000000E+0000 1.32194400000000E+0001 5.78774200000000E+0000
 1.27703180000000E+0001 7.16900400000000E+0000 1.49735580000000E+0001 8.99091400000000E+0000
 1.20754500000000E+0001 7.30458800000000E+0000
 3.62687200000000E+0000 2.86421200000000E+0000 3.86414400000000E+0000 4.52511600000000E+0000
 3.50823600000000E+0000 1.58463800000000E+0001 3.83872200000000E+0000 1.54057320000000E+0001
 4.03362400000000E+0000 1.54481020000000E+0001 3.54213200000000E+0000 1.42702160000000E+0001
 3.91498800000000E+0000 5.29625000000000E+0000 5.77926800000000E+0000 6.06738400000000E+0000
 5.24540600000000E+0000 8.29604600000000E+0000 7.48254200000000E+0000 1.11263620000000E+0001
 3.93193600000000E+0000 8.16046200000000E+0000
 1.17619120000000E+0001 2.39814200000000E+0000 1.18720740000000E+0001 3.81330000000000E+0000
 1.25330460000000E+0001 1.30160640000000E+0001 1.28465840000000E+0001 1.26262600000000E+0001
 1.30330120000000E+0001 1.26432080000000E+0001 1.23889880000000E+0001 1.15415880000000E+0001
 1.18805480000000E+0001 4.77086200000000E+0000 1.29059020000000E+0001 5.16914000000000E+0000
 1.37278800000000E+0001 8.13504000000000E+0000 1.48633960000000E+0001 1.00247420000000E+0001
 1.20923980000000E+0001 7.90624200000000E+0000
 6.88088800000000E+0000 4.66917400000000E+0000 6.63514200000000E+0000 6.39787000000000E+0000
 6.46566200000000E+0000 1.41431060000000E+0001 6.71140800000000E+0000 1.37617760000000E+0001
 6.89783600000000E+0000 1.38973600000000E+0001 6.28770800000000E+0000 1.25245720000000E+0001
 6.55040200000000E+0000 7.05036800000000E+0000 7.57575600000000E+0000 7.81302800000000E+0000
 7.26221800000000E+0000 8.94007000000000E+0000 8.94007000000000E+0000 1.10331480000000E+0001
 6.30465600000000E+0000 8.77906400000000E+0000
 1.22618780000000E+0001 2.96590000000000E+0000 1.23550920000000E+0001 4.66917400000000E+0000
 1.31685960000000E+0001 1.21093460000000E+0001 1.33973940000000E+0001 1.18466520000000E+0001
 1.36346660000000E+0001 1.18720740000000E+0001 1.29906420000000E+0001 1.07874020000000E+0001
 1.24228840000000E+0001 5.63521000000000E+0000 1.39566780000000E+0001 6.16059800000000E+0000
 1.41346320000000E+0001 8.10114400000000E+0000 1.50498240000000E+0001 9.03328400000000E+0000
 1.26177860000000E+0001 7.76218400000000E+0000
 4.99118600000000E+0000 4.97423800000000E+0000 5.12677000000000E+0000 6.10975400000000E+0000
 5.47420400000000E+0000 1.39058340000000E+0001 5.94874800000000E+0000 1.34482380000000E+0001
 6.10975400000000E+0000 1.35499260000000E+0001 5.55047000000000E+0000 1.22957740000000E+0001
 5.16066600000000E+0000 7.14358200000000E+0000 7.29611400000000E+0000 7.78760600000000E+0000
 6.32160400000000E+0000 8.25367600000000E+0000 7.82997600000000E+0000 9.61799000000000E+0000
 5.25388000000000E+0000 8.19435800000000E+0000
 5.84706000000000E+0000 2.31340200000000E+0000 5.72842400000000E+0000 3.44044400000000E+0000
 5.30472400000000E+0000 1.19059700000000E+0001 5.94027400000000E+0000 1.13890560000000E+0001
 6.36397400000000E+0000 1.15331140000000E+0001 5.38946400000000E+0000 9.48240600000000E+0000
 5.72842400000000E+0000 4.22005200000000E+0000 7.33001000000000E+0000 4.65222600000000E+0000
 6.97410200000000E+0000 6.16059800000000E+0000 8.42315600000000E+0000 7.72828800000000E+0000
 5.67758000000000E+0000 5.77079400000000E+0000
 4.49969400000000E+0000 4.10141600000000E+0000 4.22852600000000E+0000 5.77079400000000E+0000
 4.09294200000000E+0000 1.41939500000000E+0001 4.47427200000000E+0000 1.40753140000000E+0001
 4.68612200000000E+0000 1.40668400000000E+0001 4.11836400000000E+0000 1.27110000000000E+0001
 4.21157800000000E+0000 6.38939600000000E+0000 5.38099000000000E+0000 6.99952400000000E+0000
 5.05050400000000E+0000 8.48247400000000E+0000 6.68598600000000E+0000 1.03128580000000E+0001
 4.16920800000000E+0000 8.27909800000000E+0000
 1.23042480000000E+0001 2.47440800000000E+0000 1.20585020000000E+0001 4.55053800000000E+0000
 1.22364560000000E+0001 1.41007360000000E+0001 1.26771040000000E+0001 1.37617760000000E+0001
 1.29991160000000E+0001 1.37702500000000E+0001 1.21347680000000E+0001 1.20500280000000E+0001
 1.19907100000000E+0001 5.16066600000000E+0000 1.37617760000000E+0001 5.79621600000000E+0000
 1.34228160000000E+0001 7.66897000000000E+0000 1.59141720000000E+0001 9.67730800000000E+0000
 1.19483400000000E+0001 7.30458800000000E+0000
 1.25669420000000E+0001 6.39787000000000E+0000 1.24567800000000E+0001 7.27916600000000E+0000
 1.20754500000000E+0001 1.40414180000000E+0001 1.24991500000000E+0001 1.36939840000000E+0001
 1.28126880000000E+0001 1.38719380000000E+0001 1.23550920000000E+0001 1.24652540000000E+0001
 1.24313580000000E+0001 7.62660000000000E+0000 1.32448620000000E+0001 8.10114400000000E+0000
 1.35414520000000E+0001 1.00586380000000E+0001 1.48464480000000E+0001 1.13382120000000E+0001
 1.23720400000000E+0001 9.66883400000000E+0000
 5.29625000000000E+0000 2.11002600000000E+0000 5.08440000000000E+0000 3.05911400000000E+0000
 4.41495400000000E+0000 1.15500620000000E+0001 4.83018000000000E+0000 1.07874020000000E+0001
 5.15219200000000E+0000 1.11263620000000E+0001 4.45732400000000E+0000 9.07565400000000E+0000
 5.01660800000000E+0000 3.65229400000000E+0000 6.55040200000000E+0000 4.33021400000000E+0000
 6.16059800000000E+0000 5.98264400000000E+0000 7.79608000000000E+0000 7.47406800000000E+0000
 4.82170600000000E+0000 5.38946400000000E+0000
 5.64368400000000E+0000 4.42342800000000E+0000 5.91485200000000E+0000 5.83858600000000E+0000
 5.66910600000000E+0000 1.34312900000000E+0001 6.14365000000000E+0000 1.29652200000000E+0001
 6.44871400000000E+0000 1.31347000000000E+0001 5.84706000000000E+0000 1.14653220000000E+0001
 5.91485200000000E+0000 6.67751200000000E+0000 7.62660000000000E+0000 7.94013800000000E+0000
 6.88936200000000E+0000 7.76218400000000E+0000 8.51637000000000E+0000 9.69425600000000E+0000
 5.91485200000000E+0000 7.78760600000000E+0000
 1.11263620000000E+0001 1.75411800000000E+0000 1.12788940000000E+0001 3.33028200000000E+0000
 1.33634980000000E+0001 1.13127900000000E+0001 1.35922960000000E+0001 1.08636680000000E+0001
 1.38210940000000E+0001 1.09145120000000E+0001 1.27618440000000E+0001 9.72815200000000E+0000
 1.14060040000000E+0001 3.88109200000000E+0000 1.29736940000000E+0001 3.99125400000000E+0000
 1.28042140000000E+0001 5.58436600000000E+0000 1.51599860000000E+0001 7.16900400000000E+0000
 1.17703860000000E+0001 5.57589200000000E+0000
