# Supplementary material for: Leaf Morphology, Taxonomy and Geometric Morphometrics: A Simplified Protocol for Beginners
Source: PLoS One. 2011 Oct 3;6(10):e25630. doi: 10.1371/journal.pone.0025630 (PMC3184990; doi:10.1371/journal.pone.0025630)
Supplement: TPSRegr Dummy Data S1 — The dummy variables for tests in TPSRegr. (NTS) [file pone.0025630.s007.nts]

1 44L 4L 0 
 _1_Busso_T01 _1_Busso_T02 _1_Busso_T03 _1_Busso_T04 _1_Busso_T05 _1_Busso_T06 _1_Busso_T07
 _1_Busso_T08 _1_Busso_T09 _1_Busso_T10 _1_Busso_T11 _1_Busso_T12 _1_Busso_T13 _1_Busso_T14
 _1_Busso_T15 _1_Busso_T16 _1_Busso_T17 _1_Busso_T18 _1_Busso_T19 _1_Busso_T20 _1_Busso_T21
 _1_Busso_T22 _2_Campo_T01 _2_Campo_T02 _2_Campo_T03 _2_Campo_T04 _2_Campo_T05 _2_Campo_T06
 _2_Campo_T07 _2_Campo_T08 _2_Campo_T09 _2_Campo_T10 _2_Campo_T11 _2_Campo_T12 _2_Campo_T13
 _2_Campo_T14 _2_Campo_T15 _2_Campo_T16 _2_Campo_T17 _2_Campo_T18 _2_Campo_T19 _2_Campo_T20
 _2_Campo_T21 _2_Campo_T22
 centroid_size busso_centroid_size campo_centroid_size dummy_populations_variable
 13.7531282393766 13.7531282393766 0 0
 12.2178282356045 12.2178282356045 0 0
 11.7747225357382 11.7747225357382 0 0
 13.7169548251896 13.7169548251896 0 0
 10.7428019390778 10.7428019390778 0 0
 11.7825885483965 11.7825885483965 0 0
 15.042245427822 15.042245427822 0 0
 10.4054908737616 10.4054908737616 0 0
 11.3863408276265 11.3863408276265 0 0
 14.1919111346174 14.1919111346174 0 0
 11.0713839274439 11.0713839274439 0 0
 15.1906873372421 15.1906873372421 0 0
 11.2411708873161 11.2411708873161 0 0
 13.981847998021 13.981847998021 0 0
 13.8017382259932 13.8017382259932 0 0
 13.8421510264718 13.8421510264718 0 0
 14.2501605147448 14.2501605147448 0 0
 10.6077667249089 10.6077667249089 0 0
 10.9779378618979 10.9779378618979 0 0
 12.7906515463519 12.7906515463519 0 0
 10.3208268537056 10.3208268537056 0 0
 10.9909929037388 10.9909929037388 0 0
 13.2197020462007 0 13.2197020462007 1
 13.6922333257585 0 13.6922333257585 1
 13.6159190914575 0 13.6159190914575 1
 13.2258856841234 0 13.2258856841234 1
 14.0946246235586 0 14.0946246235586 1
 17.9848760620359 0 17.9848760620359 1
 12.4503967468004 0 12.4503967468004 1
 11.4127230861042 0 11.4127230861042 1
 13.9129111312843 0 13.9129111312843 1
 16.294927181023 0 16.294927181023 1
 13.7852760118676 0 13.7852760118676 1
 11.9781376057429 0 11.9781376057429 1
 12.6689466119214 0 12.6689466119214 1
 9.93913495285295 0 9.93913495285295 1
 12.3422848328544 0 12.3422848328544 1
 12.7330815747453 0 12.7330815747453 1
 16.2901293560613 0 16.2901293560613 1
 13.8300115956288 0 13.8300115956288 1
 14.0721907432343 0 14.0721907432343 1
 12.4874023278912 0 12.4874023278912 1
 16.0604827597992 0 16.0604827597992 1
 12.7157761743482 0 12.7157761743482 1
